# Supplementary material for: Synthesis and biological profiling of tellimagrandin I and analogues reveals that the medium ring can significantly modulate biological activity
Source: Royal Society of Chemistry journal article supplement (doi:10.1039/c2ob25065a), 2012-01-01
Supplement: c2ob25065a.pdf [file c2ob25065a.pdf]

**Synthesis and biological profiling of tellimagrandin I and  
analogues reveals that the medium ring significantly  
contributes to ellagitannin biological activity**

Shaojun Zheng, Luca Laraia, Cornelius J. O' Connor, David Sorrell, Yaw Sing Tan,  
Zhaochao Xu, Ashok Venkitaraman, Wenjun Wu, David R. Spring

**Supporting Information**

## *Biology*

### **1 Materials and Methods**

#### **1.1 Cells**

HeLa cells were maintained in Dulbecco's Modified Eagle Medium (DMEM) supplemented with fetal calf serum (FCS) without antibiotics, at 37 °C in a 5% CO<sub>2</sub> humidified atmosphere.

#### **1.2 Reagents**

All compounds assayed were synthesized in our labs according to the procedures specified in *Chemistry (vide infra)*. Resazurin and resofurin were purchased from Sigma Aldrich. BSA was purchased from Fluka. Hoechst was purchased from BD Pharmingen and used at 1:20,000. Anti cleaved PARP was purchased from BD Pharmingen and used at 1:800. AlexaFluor 546 Goat anti-mouse IgG was purchased from Molecular Probes and used at 1:500.

#### **1.3 High Content Analysis (HCA)**

HCA was performed using an Arrayscan II HCS reader and integrated software from Cellomics. HeLa cells were seeded in a NUNC clear flat bottomed 96-well plate at 5000/well in a total of 100 µL. They were incubated at 37 °C overnight. Cells were then treated with compounds (25 µL) at a top concentration of 300 µM, diluting serially 1:2. Cells were then incubated at 37 °C for 72 h. The medium was gently removed from all the wells and 100 µL cold methanol was added to each well. This was incubated at -20 °C for 3 min, before the methanol was removed. The wells were washed for 3 x 5 min in 100 µL/well permeabilization buffer (PB, contains PBS + 0.1% Triton X-100). PB was removed and wells washed with 100 µL/well blocking buffer (BB, contains PBS + 1% BSA). BB was removed and 50 µL/well of primary antibody solution (anti c-PARP, 1:800) was added. Plates were incubated for 2 h at room temperature. The antibody was removed and wells washed with 2 x 100 µL/well BB. BB was removed and 50 µL/well of secondary antibody solution containing Hoechst (1:20,000) and AlexaFluor 546 Goat anti-mouse IgG (1:500) was added. Plates were incubated at RT for 1 h in the dark. Secondary antibody solution was removed and plates washed with 2 x 100 µL BB. The BB was then removed and 100 µL PBS/well were added. The plates were sealed with opaque film and images taken on a 20x 0.4 NA objective. Data was analysed on Cellomics Arrayscan software using the Target Activation v4 protocol. Critical output features are: ValidObjectCount and %Responder\_AvgIntenCh2. IC<sub>50</sub> and EC<sub>50</sub> data was calculated using Prism (Graphpad).

#### **1.4 Redox Assay**

The assay was performed using a modified version of the protocol developed by Lor *et al.*<sup>[1]</sup> Ellagitannin derivatives were diluted in buffer A (50 mM HEPES, 50 mM NaCl, pH 7.5) in 1:2 from a

top concentration of 800  $\mu\text{M}$ . Resazurin was made up in buffer A at a concentration of 10  $\mu\text{M}$ , and DTT was added at a concentration of 100  $\mu\text{M}$ . Then, 15  $\mu\text{L}$  of the Ellagitannin compound solution was mixed with 15  $\mu\text{L}$  of the Resazurin solution in a clear, flat bottomed Nunc 96-well plate (Corning). The wells were allowed to react for 60 min at RT after addition of the Resazurin/DTT solution and were then read on a PheraSTAR plate reader on the Cell Titre Blue setting.

## 1.5 Protein Precipitation Assay

This assay was performed using a modified version of the protocol from Kawamoto *et al.*<sup>[2]</sup> Compounds (1.3  $\mu\text{moles}$ , 14 mM) were made up in 88  $\mu\text{L}$  of 0.2 M acetate buffer (pH 4.5) and mixed with a solution of BSA (625  $\mu\text{g}$ , 9 nmol, 0.11 mM) in 88  $\mu\text{L}$  of the buffer at RT. After shaking for 1 h, the resulting precipitates were separated by centrifugation (3000 rpm, 5 min) and washed with buffer (170  $\mu\text{L}$ ) followed by centrifugation (3000 rpm, 5 min). The precipitates obtained were dissolved by adding 250  $\mu\text{L}$  of 2.0% aq. SDS solution containing 0.5 mg of catechol as internal standard and the resulting clear solution was analysed by HPLC. CC: column: Supelcosil cat. # 59194 (15 cm x 4.6 mm x 3.0  $\mu\text{m}$ ); eluent: 0.1% aq. TFA/0.1% TFA in MeCN (15% to 85%, 20 min); flow rate: 1 mL/min; detector: UV 220 nm.  $R_f$ (min) catechol (4.25), BSA (9.20).

## 1.6 Data Analysis

All data was analysed using Graphpad Prism (v5).  $\text{IC}_{50}\text{s}$  for cell viability were obtained by using the non-linear regression analysis with a 3 component model.  $\text{EC}_{50}\text{s}$  for the induction of apoptosis were calculated using the non-linear regression analysis, as for the redox activity. Errors are given to the nearest whole number.

## Chemistry

### 2 General Experimental

Experimental techniques were performed using flame dried glassware apparatus unless otherwise indicated. Reactions were performed under nitrogen with dry, freshly distilled solvents. Dichloromethane, methanol and toluene were distilled over calcium hydride. Tetrahydrofuran and diethyl ether were distilled over a mixture of lithium aluminium hydride and calcium hydride in the presence of triphenyl methane. Petrol was distilled before use and refers to the fraction distilled between 30-40 °C. Anhydrous DMF was used as supplied by Fluka in sureseal bottles. All other reagents were purified in accordance with the instructions in 'Purification of Laboratory Chemicals' or used as obtained from commercial sources.

Room temperature (RT) refers to ambient temperature. Temperatures of 0 °C were maintained using an ice-water bath and temperatures of -78 °C were maintained using an acetone-cardice bath. Yields refer to chromatographically and spectroscopically pure compounds. All reactions were monitored by thin layer chromatography (TLC) using glass plates precoated with Merck silica gel 60 F<sub>254</sub>. Visualization was by the quenching of UV fluorescence ( $\lambda_{max} = 254$  nm) or by staining with either: ceric ammonium molybdate; potassium permanganate; or, Dragendorff's reagent (0.08% w/v bismuth subnitrate and 2% w/v KI in 3 M aq. AcOH). Retention factors ( $R_f$ ) are quoted to 0.01. All flash column chromatography was performed using Merck 9385 Kieselgel 60 silica gel.

Full spectral data for all novel compounds are given below, all previously characterized compounds gave spectra consistent with the literature. Optical rotations were recorded on a Perkin Elmer 343 polarimeter.  $[\alpha]_D^{28}$  values are reported in  $10^{-1} \text{deg. cm}^2 \text{g}^{-1}$  at 589 nm, concentration ( $c$ ) is given in  $\text{g. (100 mL)}^{-1}$ .

Melting points were obtained using a Reichert hot plate microscope with a digital thermometer attachment and are uncorrected. Proton magnetic resonance spectra were recorded on Bruker Ultrashield 400 or 500 MHz spectrometers. Proton assignments are supported by  $^1\text{H}$ - $^1\text{H}$  correlation (COSY) spectra where necessary. Chemical shifts ( $\delta_{\text{H}}$ ) are quoted in ppm to the nearest 0.01 ppm and are referenced to the residual non-deuterated solvent peak (7.26 ppm for  $\text{CHCl}_3$  of  $\text{CDCl}_3$ ; 2.54 ppm for DMSO of  $d_6$ -DMSO; 3.31 ppm for  $\text{CH}_3$  of  $\text{CD}_3\text{OD}$ ; 2.09 ppm for  $\text{CH}_3$  of  $\text{C}_3\text{D}_6\text{O}$ ). Coupling constants ( $J$ ) are reported in Hertz (Hz) to the nearest 0.1 Hz. Data are reported as follows: chemical shift; integration; multiplicity [app, apparent; br, broad; s, singlet; d, doublet; t, triplet; q, quartet; qui, quintet; sept, septet; m, multiplet; or as a combination of these (e.g. app s, br d, dd, dt, ddd.)]; coupling constant(s); and, assignment. Carbon magnetic resonance spectra were recorded on Bruker 400 or 500 MHz spectrometers operating at 100 and 125 MHz respectively. Carbon spectra assignments are supported by DEPT editing and, where necessary,  $^{13}\text{C}$ - $^1\text{H}$  correlation (HMQC) spectra and  $^{13}\text{C}$ - $^1\text{H}$  long range correlation (HMBC) spectra. Chemical shifts ( $\delta_{\text{C}}$ ) are quoted in ppm to the nearest 0.1 ppm (or 0.01 ppm where required), and are referenced to the deuterated solvent peak (77.00 ppm for  $\text{CDCl}_3$ ; 40.45 ppm for  $d_6$ -DMSO, 50.41 for  $\text{CD}_3\text{OD}$ ; 205.87 & 30.60 for  $\text{C}_3\text{D}_6\text{O}$ ). Coupling constants ( $J$ ) are

reported in Hertz (Hz) to the nearest 0.1 Hz. Data are reported as follows: chemical shift; multiplicity (singlet unless otherwise stated; d, doublet); coupling constant; and, assignment.

Infrared spectra were recorded on a Perkin Elmer 1 FT-IR Spectrometer fitted with an Attenuated Total Reflectance (ATR) sampling accessory as thin films or flattened solids. Absorption maxima ( $\nu_{max}$ ) are reported in wavenumbers ( $\text{cm}^{-1}$ ). High resolution mass spectrometric (HRMS) analyses were measured on a Micromass QTOF or a Micromass LCT Premier spectrometer at the Department of Chemistry, University of Cambridge. Mass values are reported within the error limits of  $\pm 5$  ppm.

## 2.1 Synthesis of Coupling Precursors

### 2.1.1 Methyl 3,4,5-tris(benzyloxy)benzoate

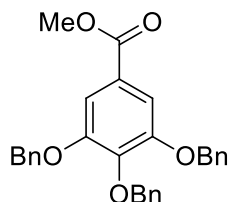

A mixture of methyl gallate (2.00 g, 10.84 mmol), benzyl bromide (4.28 mL, 36.00 mmol) and potassium carbonate (4.98 g, 36.00 mmol) in acetone (100 mL) was heated at reflux for 8 h. The reaction mixture was concentrated at reduced pressure and the resulting residue was partitioned between water (50 mL) and Et<sub>2</sub>O (50 mL). The aqueous layer was extracted further with Et<sub>2</sub>O (2 x 50 mL) and the combined organic layers were dried (Na<sub>2</sub>SO<sub>4</sub>) and concentrated. The resulting residue was recrystallized (hexane) to give the title compound (3.10 g, 63%) as a white solid.

M.p. 98-99 °C (hexane), lit.<sup>[3]</sup> 98 °C; *R<sub>f</sub>* 0.65 (SiO<sub>2</sub>, EtOAc: Pet. ether, 1:1); *v*<sub>max</sub> (neat) 1715, 1214, 1107, 751, 740, 695 cm<sup>-1</sup>; δ<sub>H</sub> (400 MHz, CDCl<sub>3</sub>) 7.52-7.38 (14H, m, Ar-H), 7.34-7.29 (3H, m, Ar-H), 5.20 (6H, s, CH<sub>2</sub>), 3.95 (3H, s, CH<sub>3</sub>); δ<sub>C</sub> (100 MHz, CDCl<sub>3</sub>) 167.0 (C), 153.0 (C), 142.9 (C), 137.9 (C), 137.1 (C), 128.9 (CH), 128.6 (CH), 128.5 (CH), 128.4 (CH), 128.0 (CH), 125.7 (C), 109.6 (CH), 75.6 (CH<sub>2</sub>), 71.7 (CH<sub>2</sub>), 52.6 (CH<sub>3</sub>); HRMS found ESI [M+H]<sup>+</sup> 455.1877, [C<sub>29</sub>H<sub>27</sub>O<sub>5</sub>]<sup>+</sup> requires 455.1858. The spectral data were consistent with literature values.<sup>[4]</sup>

### 2.1.2 3,4,5-tris(benzyloxy) benzoic acid

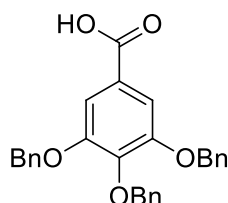

A mixture of methyl 3,4,5-tris(benzyloxy)benzoate (8.55 g, 18.80 mmol), potassium hydroxide (10.55 g, 188 mmol), MeOH (200 mL) and dioxane (200 mL) was heated at reflux for 30 min. The solvent was removed at reduced pressure, and the resulting residue was partitioned between water (150 mL) and EtOAc (200 mL). The layers were separated and the aqueous layer was extracted further with EtOAc (2 x 100 mL). The combined organic layers were washed sequentially with dilute HCl (150 mL) and brine (200 mL), dried (MgSO<sub>4</sub>) and concentrated at reduced pressure. The product was recrystallized (methanol) to give the title compound (7.67 g, 93%) as a white solid.

M.p. 195-197 °C (MeOH), lit.<sup>[5]</sup> 195-196 °C; *v*<sub>max</sub> (neat) 1682, 1593, 1427, 1332, 1125, 755, 728 cm<sup>-1</sup>; δ<sub>H</sub> (400 MHz, *d*<sub>6</sub>-DMSO) 7.47-7.46 (5H, m, Ar-H), 7.43-7.33 (9H, m, Ar-H), 7.31-7.28 (3H, m, Ar-H), 5.18 (4H, s, CH<sub>2</sub>), 5.17(2H, s, CH<sub>2</sub>); δ<sub>C</sub> (100 MHz, *d*<sub>6</sub>-DMSO) 167.7 (C), 152.9 (C), 141.9 (C), 138.3

(C), 137.7 (C), 129.3 (CH), 129.0 (CH), 128.9 (CH), 128.7 (CH), 128.4 (CH), 126.9 (C), 109.1 (CH), 75.1 (CH<sub>2</sub>), 71.1 (CH<sub>2</sub>); HRMS found ESI [M+Na]<sup>+</sup> 463.1508, [C<sub>28</sub>H<sub>24</sub>O<sub>5</sub>Na]<sup>+</sup> requires 463.1516.

### 2.1.3 Methyl 3,4,5-tris(benzyloxy)-2-bromobenzoate

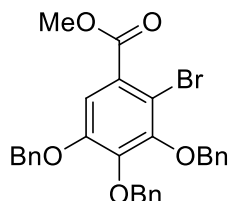

A mixture of methyl 3,4,5-tris(benzyloxy)benzoate (6.16 g, 13.55 mmol) and *N*-bromosuccinimide (2.66 g, 14.95 mmol) in DMF (60 mL) was stirred at room temperature for 24 h. The solution was then diluted with water (100 mL) and extracted with Et<sub>2</sub>O (200 mL). The organic layer was separated, washed with water (4 × 100 mL), brine (100 mL), dried (Na<sub>2</sub>SO<sub>4</sub>) and concentrated *in vacuo*. The resulting residue was recrystallized (hexane) to give the title compound (5.77 g, 80%) as white needles. M.p. 91-93 °C (hexane), lit.<sup>[4]</sup> 91-93 °C; R<sub>f</sub> 0.55 (SiO<sub>2</sub>, EtOAc: Pet. ether, 1:6); *v*<sub>max</sub> (neat) 1729, 1332, 1094, 959, 736, 683 cm<sup>-1</sup>; δ<sub>H</sub> (400 MHz, CDCl<sub>3</sub>) 7.42 (2H, dd, *J* = 7.7, 1.7, Ar-H), 7.34-7.11 (14H, m, Ar-H), 4.99 (4H, s, CH<sub>2</sub>), 4.93 (2H, s, CH<sub>2</sub>), 3.81 (3H, s, CH<sub>3</sub>); δ<sub>C</sub> (100 MHz, CDCl<sub>3</sub>) 166.0 (C), 151.4 (C), 150.5 (C), 145.4 (C), 136.3 (C), 136.2 (C), 135.6 (C), 128.3 (CH), 128.2 (CH), 128.2 (CH), 128.0 (CH), 127.9 (CH), 127.9 (CH), 127.3 (CH), 127.23 (CH), 127.21 (C), 126.5 (CH), 111.6 (C), 110.0 (CH), 75.3 (CH<sub>2</sub>), 75.0 (CH<sub>2</sub>), 70.8 (CH<sub>2</sub>), 52.1 (CH<sub>3</sub>); HRMS found ESI [M+H]<sup>+</sup> 533.0971, [C<sub>29</sub>H<sub>26</sub>O<sub>5</sub>Br]<sup>+</sup> requires 533.0964.

### 2.1.4 3,4,5-tris(benzyloxy)-2-bromobenzoic acid

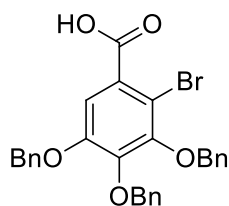

A mixture of methyl 3,4,5-tris(benzyloxy)-2-bromobenzoate (10.03 g, 18.80 mmol), potassium hydroxide (10.55 g, 188 mmol), methanol (210 mL) and dioxane (210 mL) was heated at reflux for 30 min. The reaction was cooled to RT and concentrated. The resulting residue was partitioned between water (150 mL) and EtOAc (200 mL). The layers were separated and the aqueous layer was extracted further with EtOAc (2 × 100 mL). The combined organic layers were washed sequentially with dilute HCl (100 mL) and brine (200 mL), dried (Na<sub>2</sub>SO<sub>4</sub>) and concentrated at reduced pressure. The product was recrystallized (methanol) to give the title compound (7.86 g, 81%) as a white solid.

M.p. 158-159 °C (methanol), lit.<sup>[4]</sup> 158-160 °C; *v*<sub>max</sub> (neat) 3036, 2945, 1697, 1370, 1325, 1096, 734, 683 cm<sup>-1</sup>; δ<sub>H</sub> (400 MHz, CDCl<sub>3</sub>) 7.43-7.39 (3H, m, Ar-H), 7.33-7.26 (10H, m, Ar-H), 7.20-7.12 (3H, m, Ar-H), 5.02 (4H, s, CH<sub>2</sub>), 4.93 (2H, s, CH<sub>2</sub>); δ<sub>C</sub> (100 MHz, CDCl<sub>3</sub>) 171.0 (C), 151.6 (C), 151.1 (C), 146.8 (C), 138.6 (C), 136.5 (C), 135.8 (C), 128.7 (CH), 128.6 (CH), 128.4 (CH), 128.36 (CH), 128.31

(CH), 127.6 (CH), 125.5 (CH), 113.1 (CH), 111.7 (C), 75.8 (CH<sub>2</sub>), 75.4 (CH<sub>2</sub>), 71.2 (CH<sub>2</sub>); HRMS found ESI [M+H]<sup>+</sup> 519.0819, [C<sub>28</sub>H<sub>24</sub>O<sub>5</sub>Br]<sup>+</sup> requires 519.0807.

### 2.1.5 Benzyl 2,3,4,6-tetra-O-acetyl-β-D-glucopyranoside

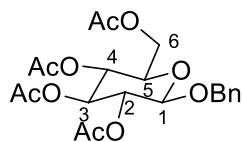

To a solution of penta-*O*-acetyl glucose (3.90 g, 10.00 mmol) and benzyl alcohol (1.08 mL, 10.00 mmol) in anhydrous CH<sub>2</sub>Cl<sub>2</sub> (20 mL) was added BF<sub>3</sub>•Et<sub>2</sub>O (1.25 mL, 10.00 mmol). The reaction mixture was stirred at RT for 24 h and diluted with 5% aq. NaHCO<sub>3</sub> (40 mL). The organic layer was separated, washed sequentially with aq. NaHCO<sub>3</sub> (20 mL) and water (30 mL), dried over Na<sub>2</sub>SO<sub>4</sub>, and concentrated. The crude product was recrystallized from EtOH to give the title compound (1.75 g, 49%) as a white solid.

M.p. 96-98 °C (EtOH), lit.<sup>[6]</sup> 96-97 °C;  $\nu_{max}$  (neat) 1755, 1723, 1366, 1233, 1215, 731 cm<sup>-1</sup>;  $\delta_H$  (400 MHz, CDCl<sub>3</sub>) 7.37-7.28 (5H, m, Ar-H), 5.22-5.07 (3H, m, C[2]H, C[3]H & C[4]H), 4.92 (1H, d,  $J$  = 12.3, CH<sub>2</sub>), 4.65 (1H, d,  $J$  = 12.3, CH<sub>2</sub>), 4.57 (1H, d,  $J$  = 7.8, C[1]H), 4.30 (1H, dd,  $J$  = 12.3, 4.7, C[6]H), 4.19 (1H, dd,  $J$  = 12.3, 2.4, C[6]H), 3.72-3.67 (1H, m, C[5]H), 2.13 (3H, s, CH<sub>3</sub>), 2.04 (3H, s, CH<sub>3</sub>), 2.03 (3H, s, CH<sub>3</sub>), 2.02 (3H, s, CH<sub>3</sub>);  $\delta_C$  (100 MHz, CDCl<sub>3</sub>) 170.7 (C), 170.3 (C), 169.4 (C), 169.3 (C), 136.6 (C), 128.5 (CH), 128.0 (CH), 127.8 (CH), 99.2 (CH), 72.8 (CH), 71.8 (CH<sub>2</sub>), 71.2 (CH), 70.7 (CH<sub>2</sub>), 68.4 (CH), 61.9 (CH<sub>2</sub>), 20.8 (CH<sub>3</sub>), 20.64 (CH<sub>3</sub>), 20.61 (CH<sub>3</sub>), 20.6 (CH<sub>3</sub>); LRMS found ESI [M+Na]<sup>+</sup> 461.2 requires 461.1.

### 2.1.6 Benzyl β-D-Glucopyranoside

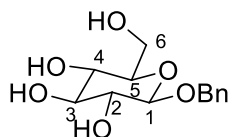

A mixture of benzyl 2,3,4,6-tetra-*O*-acetyl-β-D-glucopyranoside (896 mg, 2.50 mmol), MeOH (16 mL), triethylamine (2 mL) and H<sub>2</sub>O (2 mL) was stirred for 5 h. The reaction was concentrated *in vacuo* and the resulting residue was recrystallized from acetone to give the title compound (0.64 g, 95%) as a white solid.

M.p. 119-121 °C (acetone), lit.<sup>[7]</sup> 120-121 °C;  $\nu_{max}$  (neat) 3382, 1048, 959, 734, 696 cm<sup>-1</sup>;  $\delta_H$  (400 MHz, CD<sub>3</sub>OD) 7.33-7.17 (5H, m, Ar-H), 4.88 (1H, d,  $J$  = 11.8, CH<sub>2</sub>), 4.57 (1H, d,  $J$  = 11.8, CH<sub>2</sub>), 4.25 (1H, d,  $J$  = 7.7 Hz, C[1]H), 3.80 (1H, dd,  $J$  = 11.9, 2.1, C[6]H), 3.59 (1H, dd,  $J$  = 11.9, 5.5, C[6]H), 3.25-3.13 (4H, m, C[2]H, C[3]H, C[4]H & C[5]H);  $\delta_C$  (100 MHz, CDCl<sub>3</sub>) 137.6 (C), 128.8 (CH), 128.5 (CH), 128.3 (CH), 102.3 (CH), 76.6 (CH), 75.9 (CH), 73.7 (CH), 71.6 (CH), 69.7 (CH<sub>2</sub>), 61.6 (CH<sub>2</sub>); HRMS found ESI [M+Na]<sup>+</sup> 293.0994, [C<sub>13</sub>H<sub>18</sub>O<sub>6</sub> Na]<sup>+</sup> requires 293.0996.



### 2.1.7 Benzyl 4,6-O-benzylidene- $\beta$ -D-glucopyranoside (1)

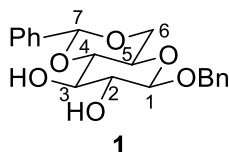

To a mixture of benzyl  $\beta$ -D-glucopyranoside (2.70 g, 10.00 mmol) and benzaldehyde dimethylacetal (1.80 mL, 12.00 mmol) in DMF (30 mL) at RT was added PTSA·H<sub>2</sub>O (528 mg, 2.50 mmol). The reaction mixture was stirred for 5 min before heating to 80 °C and stirring for 2.5 h. The mixture was cooled to RT and subsequently concentrated at reduced pressure. The resulting residue was partitioned between CH<sub>2</sub>Cl<sub>2</sub> (100 mL) and satd. Na<sub>2</sub>CO<sub>3</sub> (100 mL). The layers were separated and the aqueous layer was extracted with CH<sub>2</sub>Cl<sub>2</sub> (3 × 100 mL). The combined organic layers were washed with water (2 × 100 mL) and brine (100 mL), dried over MgSO<sub>4</sub> and concentrated. Purification of the resulting residue by flash chromatography (EtOAc-Pet. ether, 1:1) provided the desired product (3.08 g, 86%) as a white solid.

M.p. 160-163 °C, lit.<sup>[8]</sup> 159-160 °C; R<sub>f</sub> 0.30 (SiO<sub>2</sub>, EtOAc: Pet. ether, 3:2);  $\nu_{max}$  (neat) 3351, 1497, 1451, 1371, 1174, 1065, 737 cm<sup>-1</sup>;  $\delta_H$  (500 MHz, CDCl<sub>3</sub>) 7.54-7.50 (2H, m, Ar-H), 7.42-7.29 (8H, m, Ar-H), 5.57 (1H, s, C[7]H), 4.97 (1H, d, *J* = 11.5, CH<sub>2</sub>), 4.67 (1H, d, *J* = 11.6, CH<sub>2</sub>), 4.53 (1H, d, *J* = 7.8, C[1]H), 4.40 (1H, dd, *J* = 10.5, 4.9, C[4]H), 3.87-3.81 (2H, m, C[6]H and C[3]H), 3.63-3.58 (2H, m, C[6]H and C[2]H), 3.52-3.46 (1H, m, C[5]H);  $\delta_C$  (125 MHz, CDCl<sub>3</sub>) 136.9 (C), 136.7 (C), 129.3 (CH), 128.6 (CH), 128.4 (CH), 128.21 (CH), 128.20 (CH), 126.3 (CH), 102.1 (CH), 102.0 (CH), 80.6 (CH), 74.6 (CH), 73.1 (CH), 71.5 (CH<sub>2</sub>), 68.7 (CH<sub>2</sub>), 66.5 (CH); HRMS found ESI [M+Na]<sup>+</sup> 381.1307, [C<sub>20</sub>H<sub>22</sub>O<sub>6</sub>Na]<sup>+</sup> requires 381.1309.

### 2.1.8 Benzyl 4,6-O-benzylidene-2,3-bis(3,4,5-tris-(benzyloxy)benzoyl)-8-D-glucopyranoside

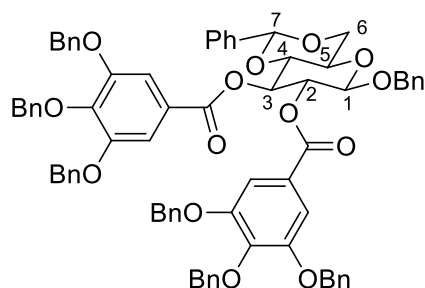

A mixture of tri-*O*-benzyl gallic acid (176 mg, 0.40 mmol), diol precursor (72 mg, 0.20 mmol), DCC (82.4 mg, 0.40 mmol), DMAP (6 mg, 0.05 mmol) and CH<sub>2</sub>Cl<sub>2</sub> (15 mL) was stirred at room temperature for 18 h. The resulting slurry was filtered through Celite<sup>®</sup> and concentrated under reduced pressure. The residue was triturated in cold Et<sub>2</sub>O (30 mL) and filtered through Celite<sup>®</sup> (to remove the unwanted

urea byproduct). The filtrate was concentrated at reduced pressure and the crude product was purified by column chromatography (EtOAc-Toluene, 1:19) to give the title compound (200 mg, 83%) as a white solid.

M.p. 173-175 °C, (lit.<sup>[7]</sup> 174.5-175.5);  $[\alpha]_{\text{D}}^{28} = +38$  (c 0.17, CHCl<sub>3</sub>), lit.<sup>[7]</sup>  $[\alpha]_{\text{D}}^{25} = +37.4$  (c 0.97, CHCl<sub>3</sub>);  $R_f$  0.60 (SiO<sub>2</sub>, EtOAc-Toluene, 1:19);  $\nu_{\text{max}}$  (neat) 1725, 1587, 1498, 1453, 1331, 1190, 1095, 734, 683 cm<sup>-1</sup>;  $\delta_{\text{H}}$  (400 MHz, CDCl<sub>3</sub>) 7.38–7.01 (44H, m, Ar-H), 5.61 (1H, t,  $J = 9.6$ , [C3]H), 5.47–5.40 (2H, m, [C2]H & [C7]H), 5.06–4.87 (12H, m, CH<sub>2</sub>), 4.81 (1H, d,  $J = 12.5$ , CH<sub>2</sub>), 4.72 (1H, d,  $J = 7.8$ , [C1]H), 4.56 (1H, d,  $J = 12.5$ , CH<sub>2</sub>), 4.38 (1H, dd,  $J = 10.5, 4.9$ , [C6]H), 3.90-3.76 (2H, m, [C4]H & [C6]H), 3.59 (1H, dt,  $J = 9.7, 4.9$ , [C5]H);  $\delta_{\text{C}}$  (100 MHz, CDCl<sub>3</sub>) 165.8 (C), 165.3 (C), 152.9 (C), 143.1 (C), 137.2 (C), 137.04 (C), 136.98 (C), 128.97 (C), 128.94 (CH), 128.86 (CH), 128.63 (CH), 128.47 (CH), 128.43 (C), 128.39 (C), 128.3 (C), 128.04 (C), 128.03 (C), 109.7 (CH), 102.0 (CH), 100.4 (CH), 79.3 (CH), 75.6 (CH<sub>2</sub>), 73.0 (CH), 72.8 (CH), 71.6 (CH<sub>2</sub>), 71.3 (CH<sub>2</sub>), 69.1 (CH<sub>2</sub>), 67.1 (CH); HRMS found ESI  $[\text{M}+\text{H}_2\text{O}]^+$  1220.4790,  $[\text{C}_{76}\text{H}_{68}\text{O}_{15}]^+$  requires 1220.4787.

### 2.1.9 Benzyl 2,3-bis(3,4,5-tris(benzyloxy)benzoyl)- $\beta$ -D-glucopyranoside

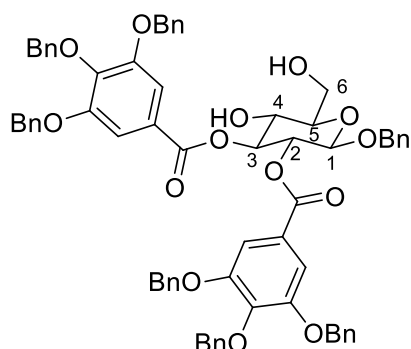

A solution of precursor (2.00 g, 1.66 mmol) and iodine (421 mg, 1.66 mmol) in dry  $\text{CH}_3\text{OH}$  (17 mL) and dry  $\text{CH}_2\text{Cl}_2$  (17 mL) was heated at reflux under nitrogen for 40 h. The solution was cooled, diluted with EtOAc (50 mL), washed with satd.  $\text{Na}_2\text{S}_2\text{O}_3$  (2 x 50 mL) and brine (50 mL), dried ( $\text{Na}_2\text{SO}_4$ ) and concentrated *in vacuo* to yield 1.83 g (99%) of the title compound as a white solid foam.

M.p. 168-170 °C;  $[\alpha]_{\text{D}}^{28} = +70.0$  (c 1.5,  $\text{CHCl}_3$ );  $R_f$  0.50 ( $\text{SiO}_2$ , EtOAc: Pet. ether, 2:1);  $\nu_{\text{max}}$  (neat) 3424, 1718, 1587, 1499, 1454, 1334, 1198, 1087, 730  $\text{cm}^{-1}$ ;  $\delta_{\text{H}}$  (400 MHz,  $\text{CDCl}_3$ ) 7.49-7.20 (39H, m, Ar-H), 5.56 (1H, t,  $J = 9.6$ , C[2]H), 5.30 (1H, t,  $J = 9.6$ , C[3]H), 5.14 (2H, d,  $J = 2.2$ ,  $\text{CH}_2$ ), 5.12 (6H, s,  $\text{CH}_2$ ), 5.05-4.92 (5H, m,  $\text{CH}_2$ ), 4.80 (1H, d,  $J = 8.0$ , C[1]H), 4.73 (1H, d,  $J = 12.5$ ,  $\text{CH}_2$ ), 4.08 (1H, dd,  $J = 11.9, 3.0$ , C[6]H), 4.09-3.94 (2H, m, C[4]H & C[6]H), 3.77 (1H, bs, OH), 3.63-3.59 (1H, m, C[5]H), 2.35 (1H, bs, OH);  $\delta_{\text{C}}$  (100 MHz,  $\text{CDCl}_3$ ) 167.6 (C), 165.0 (C), 152.6 (C), 152.6 (C), 143.0 (C), 142.9 (C), 137.38 (C), 137.36 (C), 136.8 (C), 136.53 (C), 136.51 (C), 128.6 (CH), 128.52 (CH), 128.48 (CH), 128.45 (CH), 128.4 (CH), 128.22 (CH), 128.20 (CH), 128.10 (CH), 128.06 (CH), 127.99 (CH), 127.96 (CH), 127.88 (CH), 127.64 (CH), 127.58 (CH), 124.3 (C), 123.7 (C), 109.36 (CH), 109.34 (CH), 99.5 (CH), 78.3 (CH), 76.8 (CH), 76.0 ( $\text{CH}_2$ ), 75.2 (CH), 71.7 ( $\text{CH}_2$ ), 71.22 ( $\text{CH}_2$ ), 71.15 ( $\text{CH}_2$ ), 71.0 ( $\text{CH}_2$ ), 70.2 (CH), 62.4 ( $\text{CH}_2$ ); HRMS found ESI  $[\text{M}+\text{Na}]^+$  1137.4065,  $[\text{C}_{69}\text{H}_{62}\text{O}_{14}\text{Na}]^+$  requires 1137.4037.

### 2.1.10 Benzyl 4,6-*O*-bis(2-bromo-3,4,5-tris-(benzyloxy)benzoyl)-2,3-bis-(3,4,5-tris-(benzyloxy)benzoyl)-8-*D*-glucopyranoside (2)

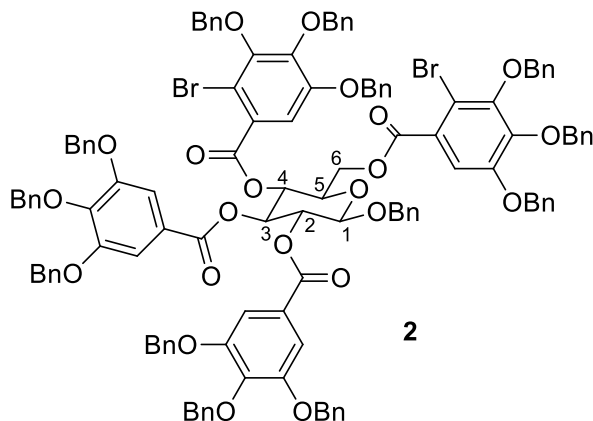

A mixture of benzoic acid precursor (213 mg, 0.41 mmol), diol (222 mg, 0.20 mmol), DCC (82 mg, 0.40 mmol), DMAP (6 mg, 0.05 mmol) and  $\text{CH}_2\text{Cl}_2$  (15 mL) was stirred at room temperature for 18 h. The resulting slurry was filtered through Celite<sup>®</sup> and concentrated under reduced pressure. The residue was dissolved in  $\text{Et}_2\text{O}$  (10 mL), filtered through Celite<sup>®</sup> and the filtrate concentrated under reduced pressure. The crude product was purified by column chromatography ( $\text{CH}_2\text{Cl}_2$ -Hexane, 1:10) to give the title compound (301 mg, 71%) as a white solid.

M.p. 147-149 °C;  $[\alpha]_{\text{D}}^{28} = +18.2$  (c 10,  $\text{CHCl}_3$ );  $R_f$  0.46 ( $\text{SiO}_2$ ,  $\text{CH}_2\text{Cl}_2$ -Hexane, 1:10);  $\nu_{\text{max}}$  (neat) 1728, 1329, 1188, 1097, 732  $\text{cm}^{-1}$ ;  $\delta_{\text{H}}$  (500 MHz,  $\text{CDCl}_3$ ) 7.53-7.19 (71H, m, Ar-H), 5.82 (1H, t,  $J = 9.5$ , C[3]H), 5.76 (1H, t,  $J = 9.5$ , C[4]H), 5.59 (1H, dd,  $J = 9.6, 8.0$ , C[2]H), 5.21-4.81 (28H, m, [C1]H &  $\text{CH}_2$ ), 4.76 (1H, dd,  $J = 12.2, 3.0$ , [C6]H), 4.70 (1H, d,  $J = 12.5$ ,  $\text{CH}_2$ ), 4.59 (1H, dd,  $J = 12.2, 4.9$ , C[6]H), 4.18-4.11 (1H, m, C[5]H);  $\delta_{\text{C}}$  (125 MHz,  $\text{CDCl}_3$ ) 161.9 (C), 161.5 (C), 160.8 (C), 160.6 (C), 148.62 (C), 148.58 (C), 147.9 (C), 147.8 (C), 147.0 (C), 142.3 (C), 139.1 (C), 138.8 (C), 133.4, 132.6 (C), 132.5 (C), 132.4 (C), 124.7 (C), 124.6 (C), 124.5 (C), 124.43 (C), 124.37 (C), 124.3 (C), 123.6 (CH), 108.5 (CH), 107.7 (CH), 106.4 (CH), 105.4 (CH), 105.2 (CH), 99.4 (CH), 73.3 ( $\text{CH}_2$ ), 73.1 ( $\text{CH}_2$ ), 72.8 ( $\text{CH}_2$ ), 71.8 ( $\text{CH}_2$ ), 71.5 ( $\text{CH}_2$ ), 71.2 ( $\text{CH}_2$ ), 71.1 ( $\text{CH}_2$ ), 69.5 (CH), 68.1 (CH), 67.8 (CH), 67.3 ( $\text{CH}_2$ ), 67.2 ( $\text{CH}_2$ ), 67.1 ( $\text{CH}_2$ ), 66.7 ( $\text{CH}_2$ ), 66.0 (CH), 59.8 ( $\text{CH}_2$ ); HRMS found ESI  $[\text{M}+\text{Na}]^+$  2137.5152,  $[\text{C}_{125}\text{H}_{104}\text{O}_{22}\text{Br}_2\text{Na}]^+$  requires 2137.5278.

## 2.2 Coupling Reaction

### 2.2.1 Benzyl Ether-Protected Tellimagrandin I

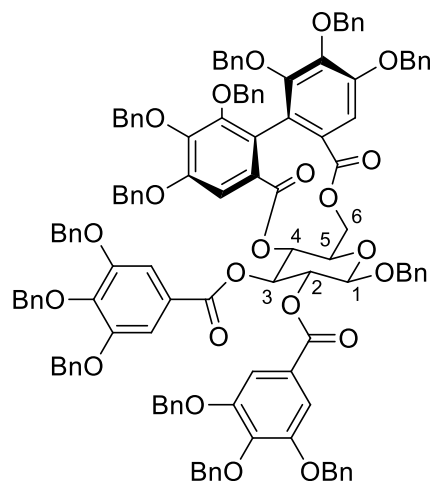

A flame dried round bottom flask containing the bromide precursor (85 mg, 0.04 mmol) and THF (2 mL) under Argon was charged with Rieke Zinc (1 mL, 5 g/100 mL in THF) and the reaction mixture heated at 80 °C for 3 h. The suspension was allowed to settle and the resulting supernatant was transferred *via* cannula onto the copper (I) bromide dimethyl sulfide complex (8 mg, 0.04 mmol) contained in a second round bottom flask. The oxidant (24 mg, 0.08 mmol) and THF (2 mL) were then added and the solution stirred for 1 h at RT. The reaction mixture was filtered through a plug of silica, washed (EtOAc-hexane, 1:20), and the filtrate concentrated under reduced pressure. The crude product was purified by column chromatography to give the title compound (53 mg, 68%) as a brown solid.

M.p. 71-73 °C,  $[\alpha]_D^{28} = +10$  (c 0.18, CHCl<sub>3</sub>);  $R_f$  0.45 (SiO<sub>2</sub>, EtOAc-hexane, 1:20);  $\nu_{max}$  (neat) 1721, 1587, 1453, 1428, 1331, 1092, 732 cm<sup>-1</sup>;  $\delta_H$  (500 MHz, CDCl<sub>3</sub>) 7.53-7.08 (62H, m, Ar-H), 7.06-6.81 (9H, m, Ar-H), 5.70-5.52 (2H, m, C[3]H & C[2]H), 5.49-5.35 (2H, m, C[6]H & C[4]H), 5.26-4.63 (27H, m, C[1]H, -CH<sub>2</sub>), 4.16-4.07 (2H, m, C[6]H & C[5]H);  $\delta_C$  (125 MHz, CDCl<sub>3</sub>) 168.1 (C), 167.3 (C), 166.5 (C), 165.3 (C), 153.2 (C), 153.2 (C), 153.09 (C), 153.06 (C), 152.9 (C), 152.8 (C), 145.2 (C), 145.0 (C), 143.5 (C), 143.3 (C), 138.2 (C), 138.1 (C), 137.9 (C), 137.1 (C), 137.0 (CH), 136.98 (CH), 136.93 (C), 129.2 (CH), 129.13 (CH), 129.09 (CH), 129.0 (CH), 128.97 (CH), 128.88 (CH), 128.86 (CH), 128.78 (CH), 128.75 (CH), 128.66 (CH), 128.63 (CH), 128.6 (CH), 128.5 (CH), 128.4 (CH), 128.3 (CH), 128.2 (CH), 128.15 (CH), 128.13 (CH), 127.9 (CH), 124.8 (C), 124.5 (C), 124.1 (C), 124.0 (C), 109.93 (C), 109.85 (C), 108.4 (CH), 108.3 (CH), 100.4 (CH), 76.04 (CH<sub>2</sub>), 76.00 (CH<sub>2</sub>), 75.7 (CH<sub>2</sub>), 75.7 (CH<sub>2</sub>), 75.6 (CH<sub>2</sub>), 75.4 (CH<sub>2</sub>), 74.1 (CH<sub>2</sub>), 72.8 (CH), 72.3 (CH), 71.8 (CH<sub>2</sub>), 71.7 (CH<sub>2</sub>), 71.3 (CH<sub>2</sub>), 71.0 (CH), 63.8 (CH<sub>2</sub>); HRMS found ESI  $[M+Na]^+$  1979.6849,  $[C_{125}H_{104}O_{22}Na]^+$  requires 1979.6911.

## 2.2.2 Tellimagrandin I (TI)

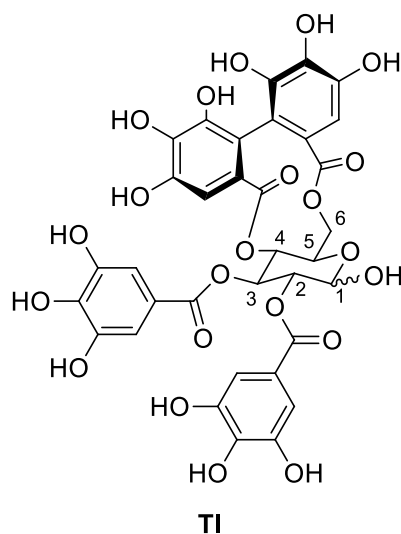

A round bottom flask containing a solution of benzyl protected tellimagrandin I (40 mg, 0.02 mmol) in THF (10 mL) was charged with 10% Pd/C (25 mg, 10 wt. % loading). The system was purged several times with hydrogen and stirred under a balloon of hydrogen for 15 h. The reaction mixture was then filtered through Celite<sup>®</sup> and the filtrate concentrated at reduced pressure to give the tellimagrandin I (16 mg, 99%) as brown amorphous powder. The crude product was isolated in >95% purity as determined by <sup>1</sup>H NMR analysis. An analytically pure sample was prepared by purification of the crude product material using reverse phase column chromatography (stationary phase = KP-C18-HS, 60 Å, solution phase = MeOH-H<sub>2</sub>O, 10:1).

M.p. 79-81°C;  $[\alpha]_D^{28} = +139.8$  (c 0.25, acetone), lit.<sup>[9]</sup>  $[\alpha]_D^{28} = +140.7$  (c 0.1, acetone);  $\nu_{max}$  (neat) 3650-3000, 1705, 1614, 1446, 1318, 743 cm<sup>-1</sup>;  $\delta_H$  (500 MHz, C<sub>3</sub>D<sub>6</sub>O) 7.08 (2H, s, Ar-H $\alpha$ ), 7.07 (2H, s, Ar-H $\beta$ ), 7.00 (2H, s, Ar-H), 6.96 (2H, s, Ar-H $\beta$ ), 6.67 (1H, s, Ar-H $\beta$ ), 6.66 (1H, s, Ar-H $\beta$ ), 6.48 (1H, s, Ar-H $\alpha$ ), 6.45 (1H, s, Ar-H $\beta$ ), 5.90 (1H, t,  $J = 10.0$ , C[3 $\alpha$ ]H), 5.64 (1H, t,  $J = 9.8$ , C[3 $\beta$ ]H), 5.58 (1H, d,  $J = 3.7$ , C[1 $\alpha$ ]H), 5.35-5.23 (3H, m, C[1 $\beta$ ]H, C[6 $\alpha$ ]H & C[6 $\beta$ ]H), 5.16-5.09 (4H, m, C[4 $\alpha$ ]H, C[4 $\beta$ ]H, C[2 $\alpha$ ]H & C[2 $\beta$ ]H), 4.69 (1H, dd,  $J = 9.9, 6.7$ , C[5 $\alpha$ ]H), 4.29 (1H, dd,  $J = 9.7, 6.4$ , C[5 $\beta$ ]H), 3.86 (1H, d,  $J = 13.2$ , C[6 $\beta$ ]H), 3.80 (1H, d,  $J = 12.6$ , C[6 $\alpha$ ]H);  $\delta_C$  (125 MHz, C<sub>3</sub>D<sub>6</sub>O) 168.1 (C), 168.0 (C), 167.6 (C), 166.4 (C), 166.2 (C), 166.0 (C), 165.5 (C), 145.9 (C), 145.8 (C), 145.61 (C), 145.58 (C), 145.2 (C), 144.3 (C), 138.7 (C), 136.2 (C), 126.7 (C), 126.1 (C), 120.9 (C), 120.8 (C), 115.6 (CH), 115.4 (CH), 109.98 (CH), 109.95 (CH), 108.13 (CH), 108.09 (CH), 107.8 (CH), 96.7 (CH), 91.2 (CH), 74.1 (CH), 73.5 (CH), 72.9 (CH), 72.0 (CH), 71.08 (CH), 71.05 (CH), 71.02 (CH), 67.3 (CH), 63.4 (CH<sub>2</sub>); HRMS found ESI [M+H]<sup>+</sup> 787.1033, [C<sub>34</sub>H<sub>27</sub>O<sub>22</sub>]<sup>+</sup> requires 787.0994.

## 2.3 Polyphenol Analogues

### 2.3.1 2,3-Digalloyl-D-glucose (3)

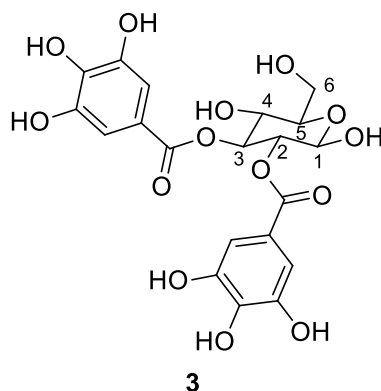

$\nu_{max}$  (neat) 3373, 1696, 1368, 1236  $\text{cm}^{-1}$ ;  $\delta_{\text{H}}$  (500 MHz,  $\text{CD}_3\text{OD}$ ) 7.04 (2H, bs, OH), 7.00 (4H, s, Ar-H), 6.97 (1H, bs, OH), 5.72 (1H, t,  $J = 9.7$ ), 5.43 (1H, d,  $J = 3.5$ ), 5.38 (1H, t,  $J = 9.5$ ), 5.06 (1H, dd,  $J = 9.8$ , 8.0), 4.97 (1H, dd,  $J = 10.2$ , 3.5), 4.02-3.96 (1H, m), 3.93-3.72 (6H, bs, OH);  $\delta_{\text{C}}$  (125 MHz,  $\text{CD}_3\text{OD}$ ) 168.3 (C), 167.9 (C), 167.7 (C), 167.4 (C), 146.3 (C), 140.0 (C), 139.8 (C), 121.5 (C), 121.2 (C), 121.1 (C), 120.8 (C), 110.4 (CH), 110.3 (CH), 96.4 (CH), 91.4 (CH), 78.2 (CH), 77.1 (CH), 74.8 (CH), 74.2 (CH), 73.7 (CH), 73.0 (CH), 69.93 (CH), 69.89 (CH), 62.4 ( $\text{CH}_2$ ), 62.3 ( $\text{CH}_2$ ); HRMS found ESI  $[\text{M}+\text{Na}]^+$  507.0724,  $[\text{C}_{20}\text{H}_{20}\text{O}_{14}\text{Na}]^+$  requires 507.0745.

### 2.3.2 2,3-Digalloyl-4,5-di(bromogalloyl)-D-glucose (4)

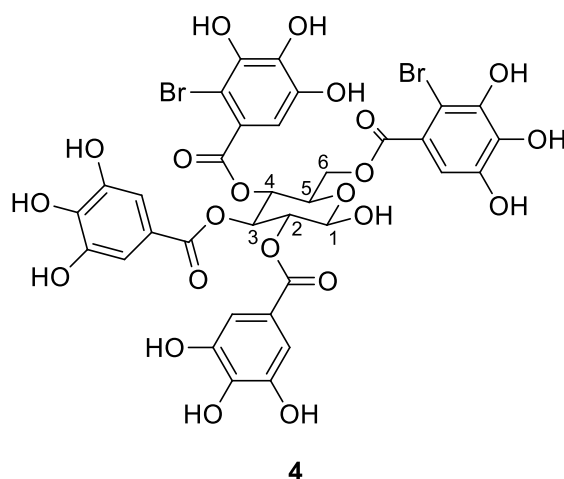

$\nu_{max}$  (neat) 3313, 1738, 1365, 1228, 1217, 1016  $\text{cm}^{-1}$ ; (mixture of anomers  $\alpha:\beta$ -2:1)  $\delta_{\text{H}}$  (500 MHz,  $\text{CD}_3\text{OD}$ ) 7.13 (1H, Ar-H), 7.12 (1H, s, Ar-H), 7.01 (2H, s, Ar-H), 6.99 (2H, s, Ar-H), 6.97 (2H, s, Ar-H), 6.93 (2H, s, Ar-H), 6.82 (1H, s, Ar-H), 6.78 (1H, s, Ar-H), 6.00 (1H, t,  $J = 9.8$ ), 5.74 (1H, t,  $J =$

9.6) 5.64-5.56 (2H, m), 5.51 (1H, d,  $J = 3.5$ ), 5.22 (1H, dd,  $J = 9.7, 8.0$ ), 5.14 (1H, dd,  $J = 10.2, 3.5$ ), 5.06 (1H, d,  $J = 8.0$ ), 4.58-4.44 (5H, m), 4.23-4.19 (1H, m);  $\delta_c$  (125 MHz, CD<sub>3</sub>OD) 166.3 (C), 166.0 (C), 165.97 (C), 165.86 (C), 165.65 (C), 165.4 (C), 144.84 (C), 144.80 (C), 144.75 (C), 144.72 (C), 143.9 (C), 143.8 (C), 143.54 (C), 143.45 (C), 138.63 (C), 138.54 (C), 138.52 (C), 138.46 (C), 137.86 (C), 137.82 (C), 137.78 (C), 121.04 (C), 121.01 (C), 120.9 (C), 120.8 (C), 119.3 (CH), 119.26 (CH), 119.04 (CH), 118.96 (CH), 110.34 (C), 110.29 (C), 109.7 (C), 108.96 (CH), 108.93 (CH), 108.87 (CH), 108.82 (CH), 100.62 (CH), 100.58 (CH), 100.11 (CH), 100.03 (CH), 99.0 (CH), 89.9 (CH), 73.1 (CH), 72.8 (CH), 71.9 (CH), 71.6 (CH), 70.1 (CH), 69.2 (CH), 69.0 (CH<sub>2</sub>), 66.8 (CH), 62.7 (CH<sub>2</sub>); HRMS found ESI [M+Na]<sup>+</sup> 966.9216, [C<sub>34</sub>H<sub>26</sub>O<sub>22</sub>Br<sub>2</sub>Na]<sup>+</sup> requires 966.9175.

## 2.4 Medium Ring Analogue Synthesis

### General Procedure for the Synthesis of Medium Ring Analogues, Procedure A:

A mixture of the diacid (176.0 mg, 0.20 mmol), the diol (0.20 mmol), DCC (41.2 mg, 0.20 mmol), DMAP (6.0 mg, 0.05 mmol) and CH<sub>2</sub>Cl<sub>2</sub> (15.00 mL) was stirred at room temperature for 12 hr. The resulting slurry was filtered through Celite<sup>®</sup> and concentrated under reduced pressure. The residue was dissolved in ether (10.00 mL), filtered through Celite<sup>®</sup> and the filtrate concentrated under reduced pressure. The crude product was used in the next step without further purification. To a solution of the resulting compound in THF (10.00 mL) was added Pd/C (100.0 mg) and the reaction was placed under a hydrogen atmosphere. The reaction was stirred overnight and then filtered through Celite<sup>®</sup> and the filtrate concentrated under reduced pressure. The crude product was purified by HPLC to get the Medium Ring Analogue.

### 2.4.1 1,2,3,13,14,15-hexahydroxy-8,9-dihydro-5H-dibenzo[g,i][1,5]dioxacycloundecine-5,11(7H)-dione (5)

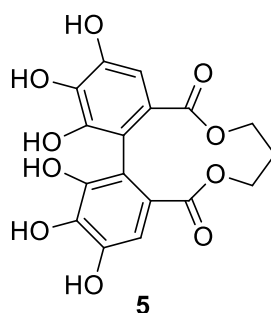

Prepared according to the previously reported literature procedure.<sup>[10]</sup>

$\nu_{max}$  (neat)/cm<sup>-1</sup> 3119, 1686, 1614, 1514, 1398, 1340, 1247, 1188, 1041;  $\delta_H$  (500 MHz, *d*<sub>6</sub>-DMSO) 9.23 (1H, br s, OH), 8.70 (1H, br s, OH), 8.02 (1H, br s, OH), 7.01 (3H, br s, OH), 6.37 (2H, s, Ar-H), 4.57-4.40 (2H, m), 3.92-3.88 (2H, m), 1.97-1.92 (2H, m); HRMS found ESI [M+H]<sup>+</sup> 379.0658, [C<sub>17</sub>H<sub>15</sub>O<sub>10</sub>]<sup>+</sup> requires 379.0665.



#### 2.4.2 1,2,3,15,16,17-Hexahydroxy-8,9,10,11-tetrahydro-5H-dibenzo[i,k][1,7]dioxacyclotridecine-5,13(7H)-dione (6)

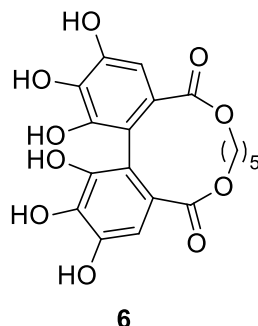

Prepared according the general procedure A using 1,5-Pentanediol (20.8 mg, 0.2 mmol). The desired product was isolated in 33% yield (26.6 mg), over 2 steps.

$\nu_{max}$  (neat) 3345, 1702, 1618, 1313, 1221, 1023  $\text{cm}^{-1}$ ;  $\delta_{\text{H}}$  (500 MHz,  $\text{CD}_3\text{OD}$ ) 7.14 (2H, s, Ar-H), 3.96-3.86 (4H, m), 1.54-1.39 (4H, m), 1.24-1.13 (2H, m);  $\delta_{\text{C}}$  (125 MHz,  $\text{CD}_3\text{OD}$ ) 168.4 (C), 143.8 (C), 143.3 (C), 137.1 (C), 136.2 (C), 130.8 (C), 121.3 (C), 118.3 (C), 109.4 (CH), 61.3 ( $\text{CH}_2$ ), 27.8 ( $\text{CH}_2$ ), 21.8 ( $\text{CH}_2$ ); HRMS found ESI  $[\text{M}+\text{Na}]^+$  429.0801,  $[\text{C}_{19}\text{H}_{18}\text{O}_{10}\text{Na}]^+$  requires 429.0792.

#### 2.4.3 1,2,3,16,17,18-Hexahydroxy-7,8,9,10,11,12-hexahydrodibenzo[c,e][1,8]dioxacyclotetradecine-5,14-dione (7)

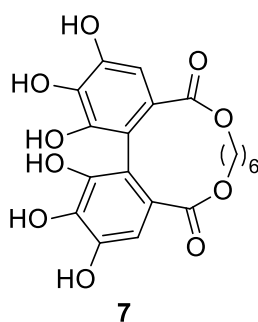

Prepared according the general procedure A using 1,6-Hexanediol (23.6 mg, 0.20 mmol). The desired product was isolated in 22% yield (18.1 mg), over 2 steps.

$\nu_{max}$  (neat) 3359, 1698, 1615, 1316, 1228, 1020  $\text{cm}^{-1}$ ;  $\delta_{\text{H}}$  (500 MHz,  $\text{CD}_3\text{OD}$ ) 7.01 (2H, s, Ar-H), 4.47 (2H, dt,  $J = 11.4, 2.0$ ), 3.83-3.80 (2H, m), 1.87-1.81 (2H, m), 1.58-1.40 (2H, m), 1.18-1.12 (2H, m);  $\delta_{\text{C}}$  (125 MHz,  $\text{CD}_3\text{OD}$ ) 168.7 (C), 145.2 (C), 145.0 (C), 138.4 (C), 123.0 (C), 119.3 (C), 110.6 (CH), 62.5 ( $\text{CH}_2$ ), 28.6 ( $\text{CH}_2$ ), 23.5 ( $\text{CH}_2$ ); HRMS found ESI  $[\text{M}+\text{H}]^+$  421.1120,  $[\text{C}_{20}\text{H}_{21}\text{O}_{10}]^+$  requires 421.1188.

#### 2.4.4 1,2,3,17,18,19-Hexahydroxy-8,9,10,11,12,13-hexahydro-5H-dibenzo[c,e][1,8]dioxacyclopentadecine-5,15(7H)-dione (8)

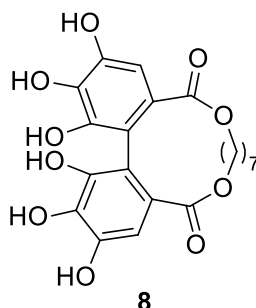

Prepared according the general procedure A using 1,7-Heptanediol (26.3 mg, 0.20 mmol), The desired product was isolated in 20% yield (17.5 mg), over 2 steps.

$\nu_{max}$  (neat)/ $\text{cm}^{-1}$  3387, 1689, 1593, 1319, 1214, 1046;  $\delta_{\text{H}}$  (500 MHz,  $\text{CD}_3\text{OD}$ ) 7.15 (2H, s, Ar-H), 4.12-4.10 (2H, m), 3.95 (2H, t,  $J = 10.0$ ), 1.47-1.33 (8H, m), 1.26-1.12 (2H, m);  $\delta_{\text{C}}$  (125 MHz,  $\text{CD}_3\text{OD}$ ) 168.7 (C), 145.2 (C), 145.0 (C), 138.4 (C), 123.0 (C), 119.3 (C), 110.6 (CH), 66.0 ( $\text{CH}_2$ ), 28.6 ( $\text{CH}_2$ ), 28.1 ( $\text{CH}_2$ ) 26.1 ( $\text{CH}_2$ ); HRMS found ESI  $[\text{M}+\text{H}]^+$  435.1277,  $[\text{C}_{21}\text{H}_{23}\text{O}_{10}]^+$  requires 435.1286.

#### 2.4.5 1,2,3,18,19,20-Hexahydroxy-7,8,9,10,11,12,13,14-octahydrodibenzo[c,e][1,8]dioxacyclohexadecine-5,16-dione (9)

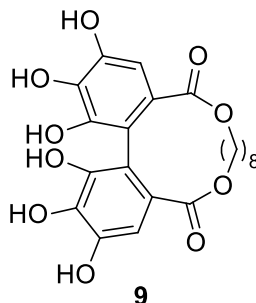

Prepared according the general procedure A using 1,7-Octanediol (29.2 mg, 0.20 mmol). The desired product was isolated in 17% yield (15 mg), over 2 steps.

$\nu_{max}$  (neat)/ $\text{cm}^{-1}$  3316, 1738, 1617, 1365, 1228, 1040;  $\delta_{\text{H}}$  (500 MHz,  $\text{CD}_3\text{OD}$ ) 7.21 (2H, s, Ar-H), 4.07-4.00 (2H, m), 3.76-3.69 (2H, m), 1.89-1.86 (2H, m), 1.44-1.43 (4H, m), 1.30-1.23 (6H, m);  $\delta_{\text{C}}$  (125 MHz,  $\text{CD}_3\text{OD}$ ) 169.0 (C), 145.1 (C), 144.7 (C), 138.9 (C), 122.0 (C), 120.6 (C), 111.2 (CH), 65.0 ( $\text{CH}_2$ ), 28.7 ( $\text{CH}_2$ ), 27.6 ( $\text{CH}_2$ ), 26.5 ( $\text{CH}_2$ ), 25.1 ( $\text{CH}_2$ ); HRMS found ESI  $[\text{M}+\text{H}]^+$  449.1435,  $[\text{C}_{22}\text{H}_{25}\text{O}_{10}]^+$  requires 449.1442.

#### 2.4.6 1,2,3,19,20,21-Hexahydroxy-8,9,10,11,12,13,14,15-octahydro-5H-dibenzo[ c,e][1,8]dioxacycloheptadecine-5,17(7H)-dione (10)

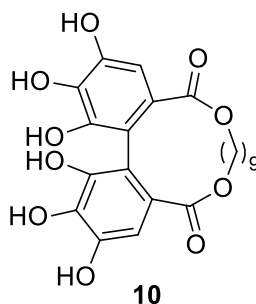

Prepared according the general procedure A using 1,7-Nonanediol (32.0 mg, 0.20 mmol). The desired product was isolated in 10% yield (10 mg), over 2 steps.

$\nu_{max}$  (neat) 3446, 1738, 1365, 1228, 1216  $\text{cm}^{-1}$ ;  $\delta_H$  (500 MHz,  $\text{CD}_3\text{OD}$ ) 7.17 (2H, s, Ar-H), 4.01-3.95 (4H, m), 1.94-1.83 (2H, m), 1.67-1.54 (4H, m), 1.36-1.23 (8H, m);  $\delta_C$  (125 MHz,  $\text{CD}_3\text{OD}$ ) 169.5 (C), 145.07 (C), 144.7 (C), 138.7 (C), 122.2 (C), 120.4 (C), 110.8 (CH), 64.3 ( $\text{CH}_2$ ), 29.0 ( $\text{CH}_2$ ), 28.6 ( $\text{CH}_2$ ), 26.1 ( $\text{CH}_2$ ), 25.0 ( $\text{CH}_2$ ); HRMS found ESI  $[\text{M}+\text{H}]^+$  463.1593,  $[\text{C}_{23}\text{H}_{27}\text{O}_{10}]^+$  requires 463.1599.

#### 2.4.7 6,6'-Bis(hydroxymethyl)-[1,1'-biphenyl]-2,2',3,3',4,4'-hexaol (11)

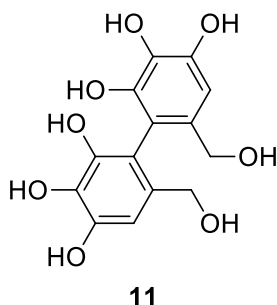

Di-*iso*-butylaluminum hydride (1.0 M solution in hexane, 1.00 mL, 1.00 mmol) was added to a solution of ester (200.0 mg, 0.20 mmol) in  $\text{CH}_2\text{Cl}_2$  (3.50 mL) at 0 °C and stirred for 3 hours. The reaction was quenched by addition of saturated aqueous sodium potassium tartrate solution (5.0 mL) and allowed to warm to room temperature. The organic layer was separated and the aqueous layer extracted with  $\text{CH}_2\text{Cl}_2$  (5.0 mL). The combined organic extracts were washed with brine (15.0 mL), dried ( $\text{MgSO}_4$ ) and the solvent removed in vacuo. The crude product was used in the next step without further purification. To a solution of the resulting compound in THF (10.0 mL) was added Pd/C (100.0 mg) and the reaction was placed under a hydrogen atmosphere (balloon). The reaction was stirred overnight and then filtered through Celite<sup>®</sup> and the filtrate concentrated under reduced pressure. The crude product was purified by HPLC to obtain the diol as a white solid (76.8 mg, 38.4%)

$\nu_{max}$  (neat) 3294, 1014  $\text{cm}^{-1}$ ;  $\delta_H$  (500 MHz,  $\text{CD}_3\text{OD}$ ) 6.33 (2H, s, Ar-H), 5.41 (1H, s), 4.01 (1H, s), 1.76 (8H, m);  $\delta_C$  (125 MHz,  $\text{CD}_3\text{OD}$ ) 146.1 (C), 146.0 (C), 145.08 (C), 145.06 (C), 131.9 (C), 129.83 (C),

129.75 (C), 116.3 (C), 109.6 (CH), 19.44 (CH<sub>2</sub>), 19.37 (CH<sub>2</sub>) (isolated as a mixture of atropisomers); HRMS found ESI [M+H]<sup>+</sup> 311.0717, [C<sub>14</sub>H<sub>15</sub>O<sub>8</sub>]<sup>+</sup> requires 311.0761.

### General Procedure for the synthesis of medium ring analogues: Procedure B

A mixture of appropriate diol (127.0 mg, 0.15 mmol), the diacid (0.15 mmol), DCC (30.9 mg, 0.15 mmol), DMAP (6.0 mg, 0.05 mmol) and CH<sub>2</sub>Cl<sub>2</sub> (10.0 mL) was stirred at room temperature for 12 hr. The resulting slurry was filtered through Celite<sup>®</sup> and concentrated under reduced pressure. The residue was dissolved in ether (10.0 mL), filtered through Celite<sup>®</sup> and the filtrate concentrated under reduced pressure. The crude product was used in the next step without further purification. To a solution of the resulting compound in THF (10.0 mL) was added Pd/C (80.0 mg) and the reaction was placed under a hydrogen atmosphere (balloon). The reaction was stirred overnight and then filtered through Celite<sup>®</sup> and the filtrate concentrated under reduced pressure. The crude product was purified by HPLC to get the deprotected medium ring analogue.

#### 2.4.8 1,2,3,14,15,16-Hexahydroxy-8,9-dihydrodibenzo[h,j][1,6]dioxacyclododecane-7,10(5H,12H)-dione (12)

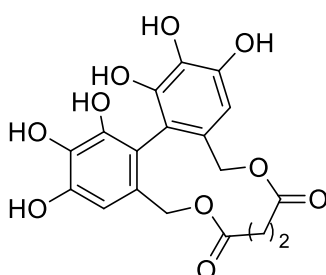

Prepared according to the general procedure B using succinic acid (17.7 mg, 0.15 mmol), to yield the product (17.1 mg, 13.5% over two steps) as an off-white solid.

$\nu_{max}$  (neat) 3256, 1721, 1345, 1032 cm<sup>-1</sup>;  $\delta_H$  (500 MHz, CD<sub>3</sub>OD) 6.53 (2H, s, Ar-H), 4.07-4.10 (4H, m), 2.51-2.41 (4H, m);  $\delta_C$  (125 MHz, CD<sub>3</sub>OD) 173.4 (C), 154.1 (C), 144.8 (C), 143.8 (C), 132.8 (C), 126.2 (C), 113.9 (CH), 107.8 (CH), 107.4 (CH), 64.4 (CH<sub>2</sub>), 28.1 (CH<sub>2</sub>); (isolated as a mixture of atropisomers); HRMS found ESI [M+Na]<sup>+</sup> 415.0636, [C<sub>18</sub>H<sub>16</sub>O<sub>10</sub>Na]<sup>+</sup> requires 415.0685.

**2.4.9 1,2,3,15,16,17-Hexahydroxy-9,10-dihydro-5H-dibenzo[i,k][1,7]dioxacyclotridecine-7,11(8H,13H)-dione (13)**

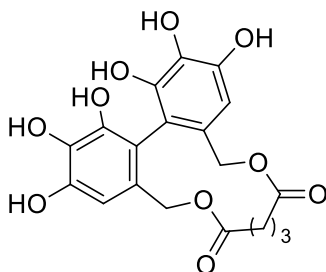

**13**

Prepared according to the general procedure B using glutaric acid (19.8 mg, 0.15 mmol), to yield the product (27.1 mg, 21.3% over two steps) as an off-white solid.

$\nu_{max}$  (neat) 3304, 1707, 1335, 1025  $\text{cm}^{-1}$ ;  $\delta_{\text{H}}$  (500 MHz,  $\text{CD}_3\text{OD}$ ) 6.55 (2H, s, Ar-H), 4.71-4.63 (4H, m), 2.51-2.36 (4H, m), 1.54-1.45 (2H, m);  $\delta_{\text{C}}$  (125 MHz,  $\text{CD}_3\text{OD}$ ) 173.1 (C), 154.1 (C), 144.7 (C), 143.9 (C), 143.6 (C), 134.7 (C), 133.0 (C), 132.5 (C), 126.6 (C), 126.1 (C), 113.3 (C), 107.9 (CH), 107.4 (CH), 64.6 ( $\text{CH}_2$ ), 30.5 ( $\text{CH}_2$ ), 20.2 ( $\text{CH}_2$ ); (isolated as a mixture of atropisomers); HRMS found ESI  $[\text{M}+\text{Na}]^+$  429.0813,  $[\text{C}_{19}\text{H}_{18}\text{O}_{10}\text{Na}]^+$  requires 429.0792.

### 3 Spectra

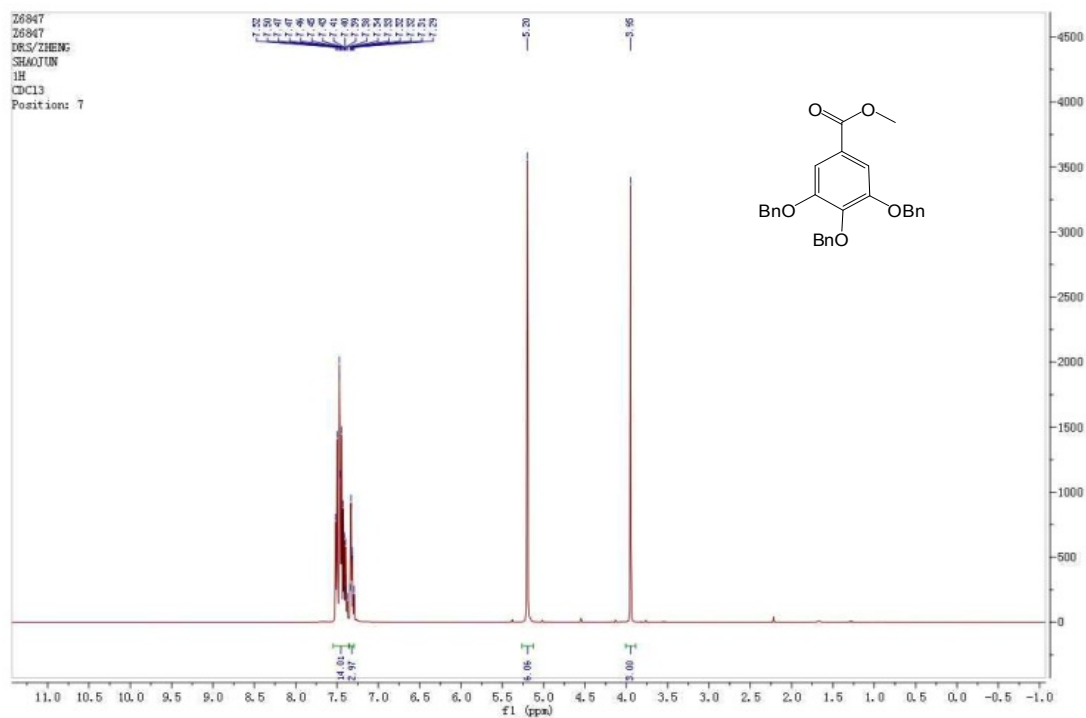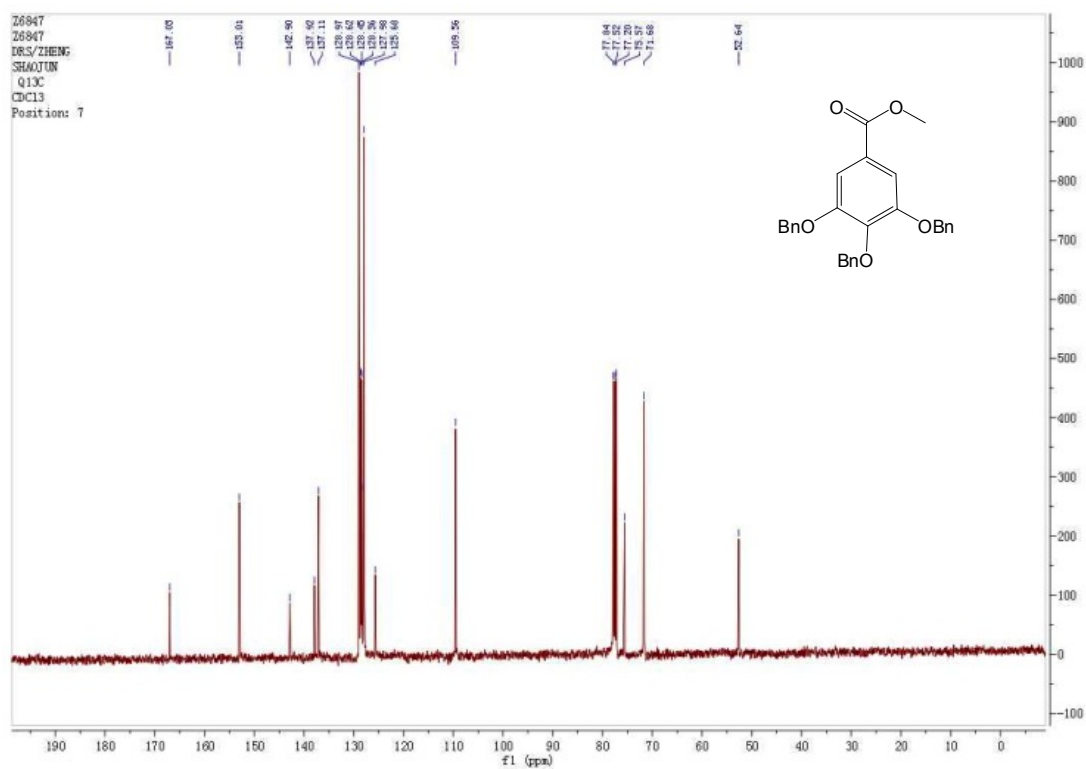

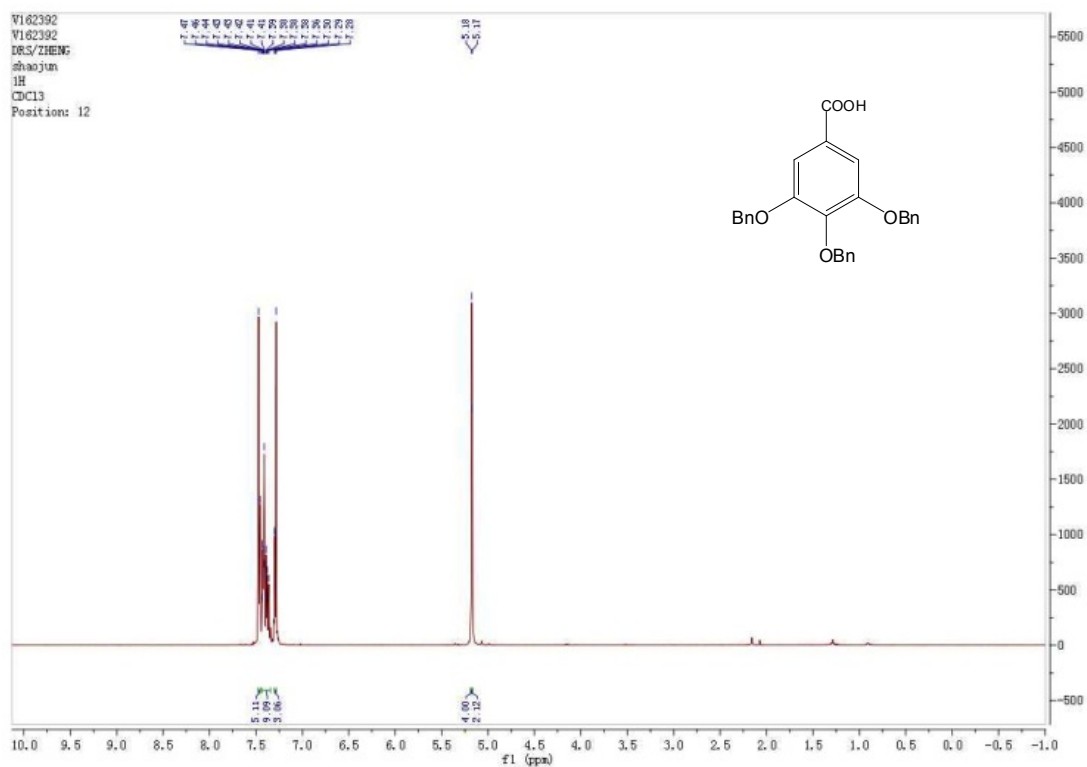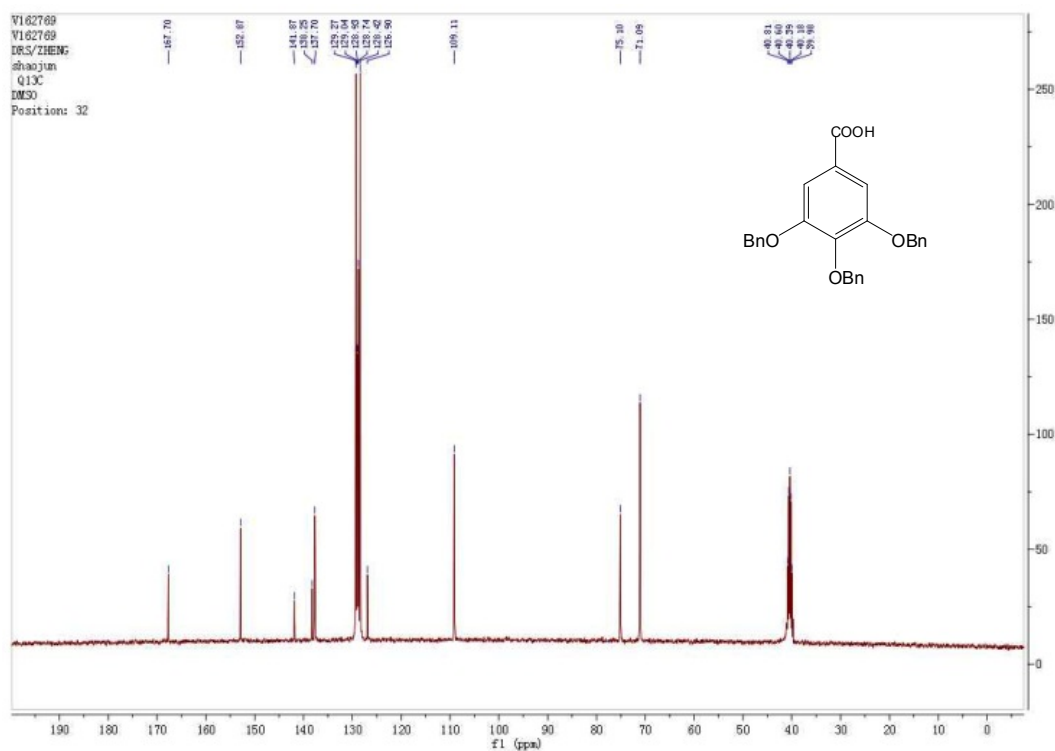

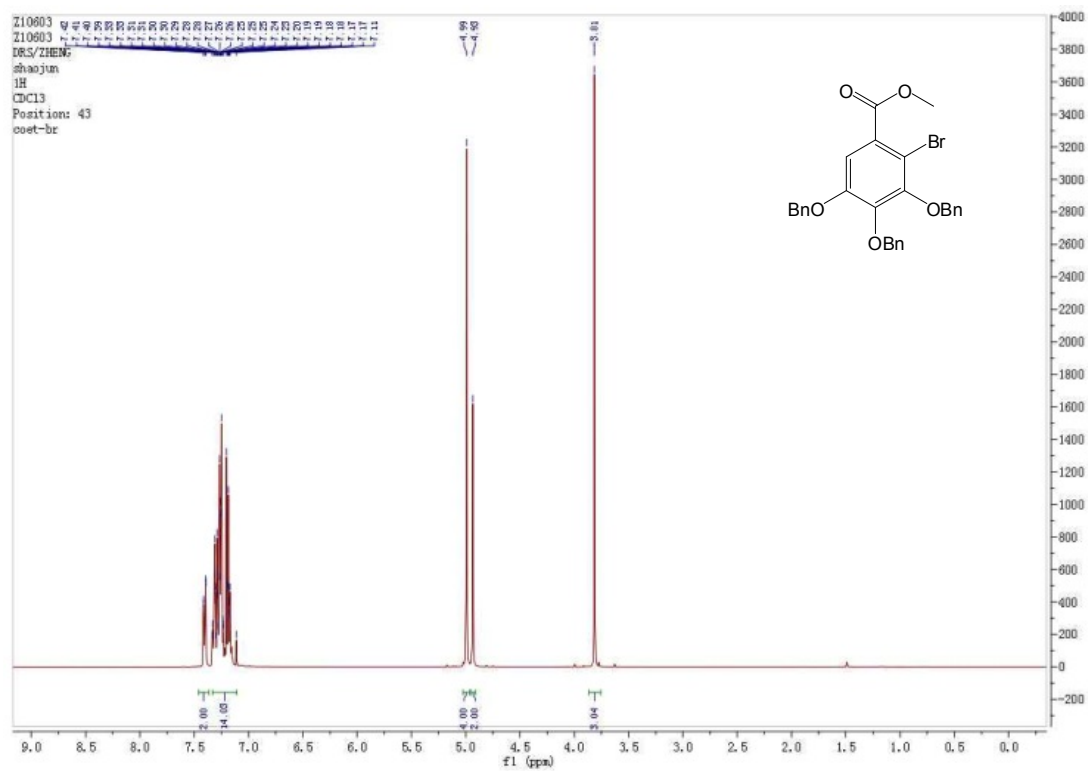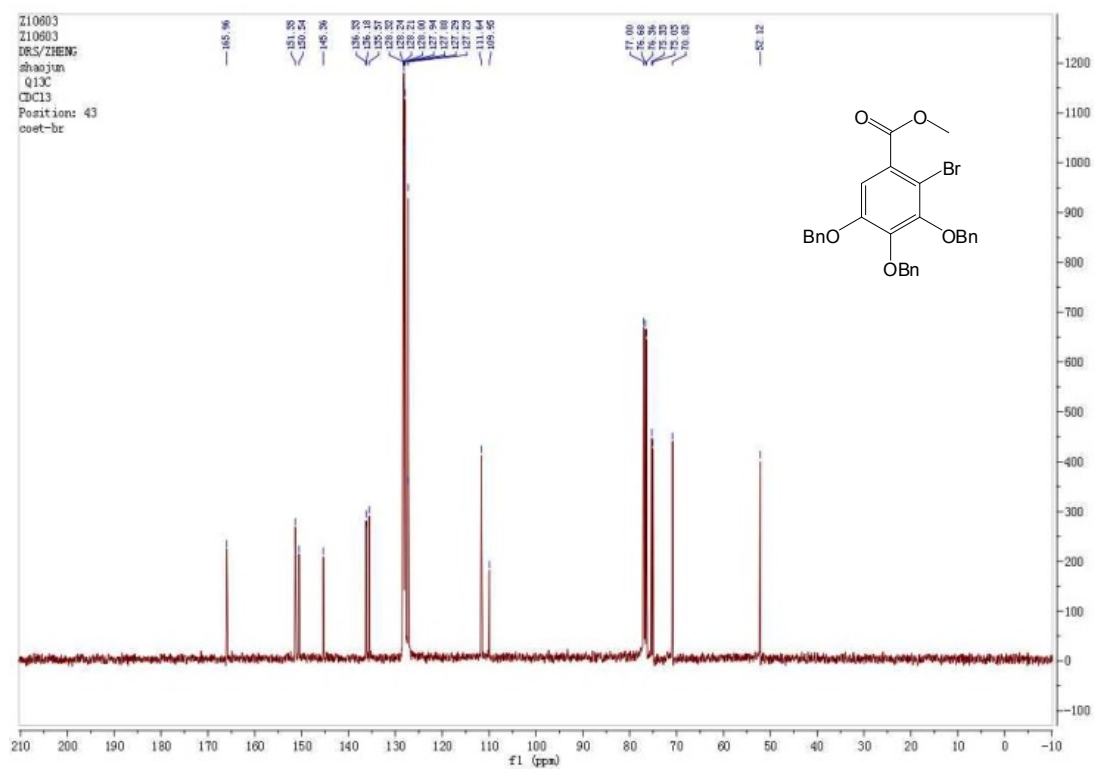



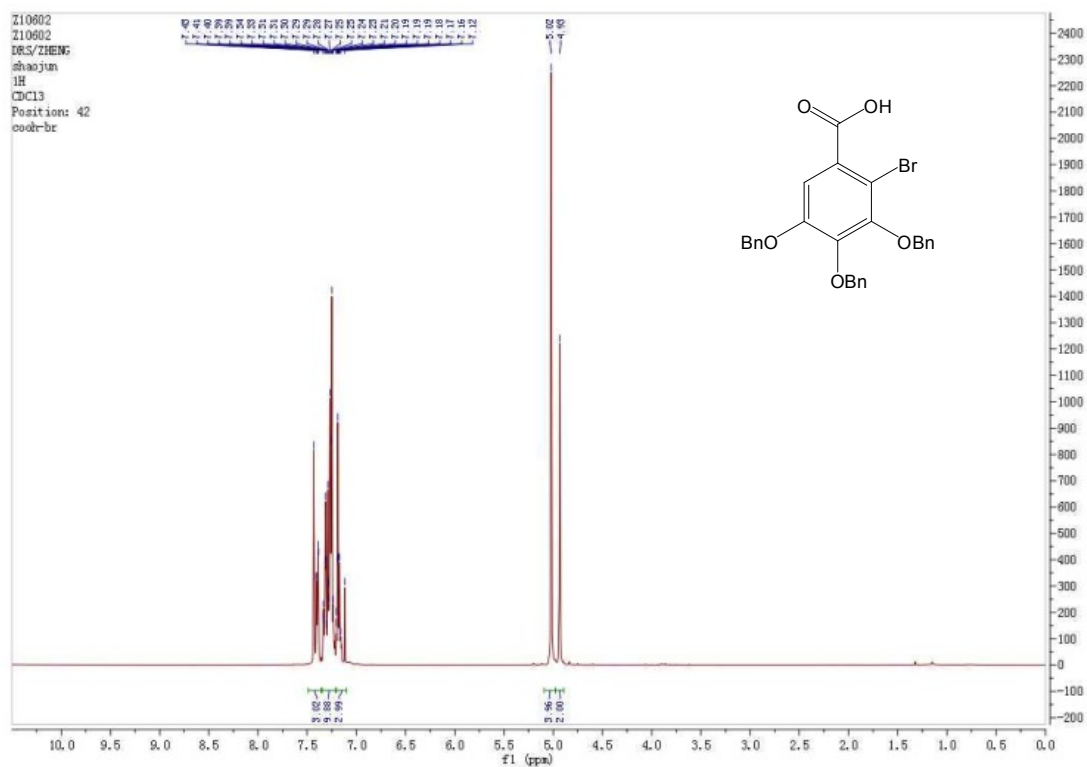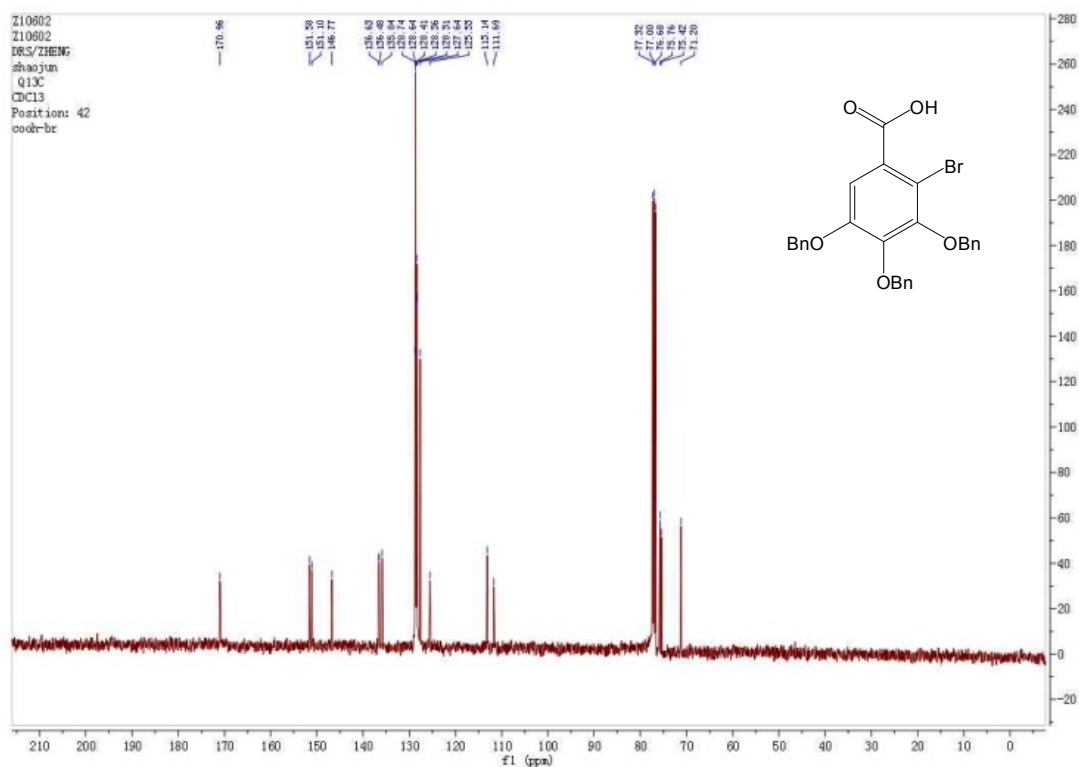

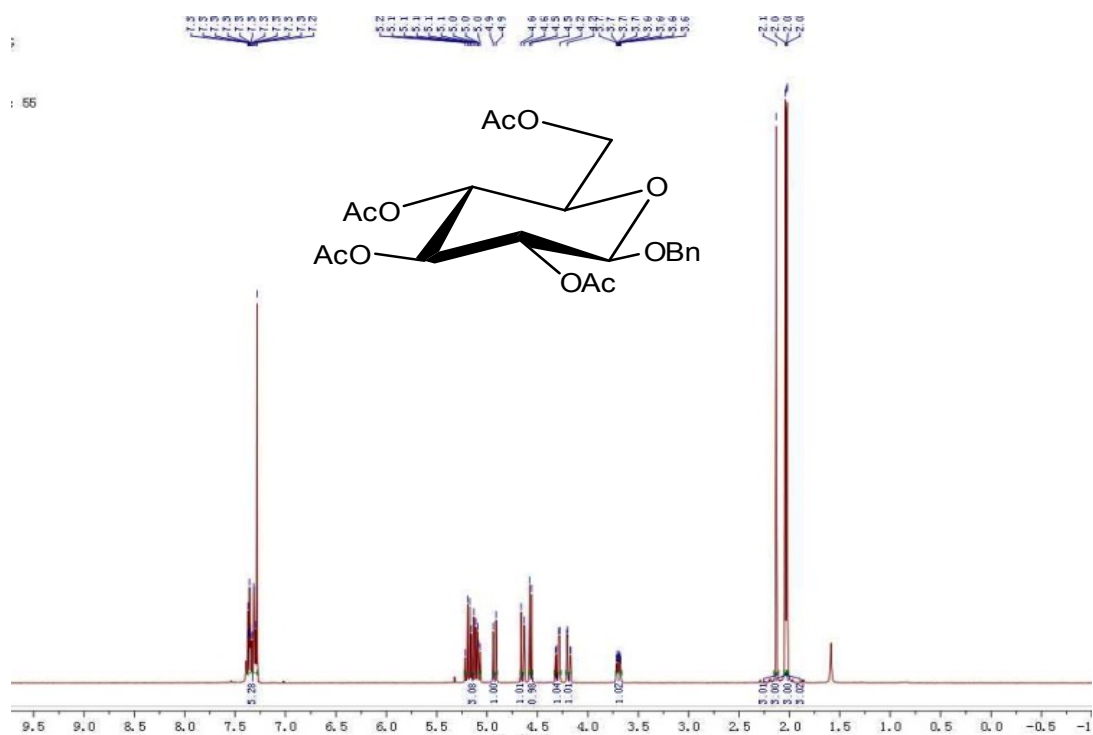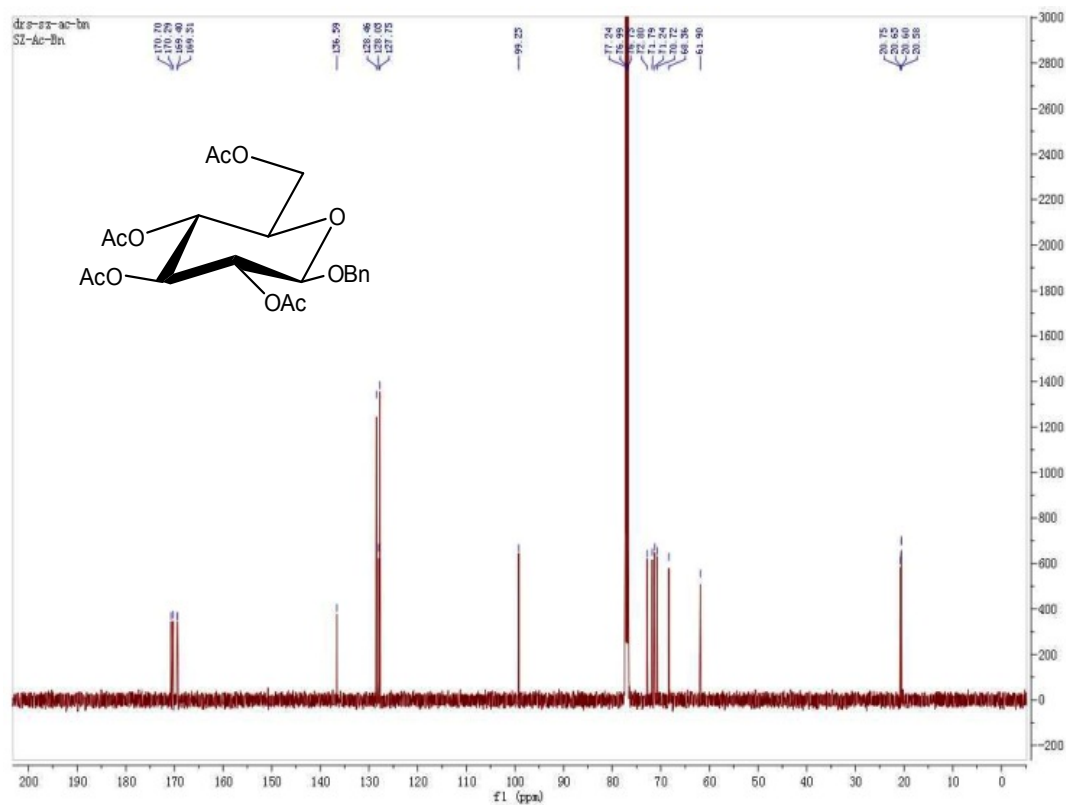

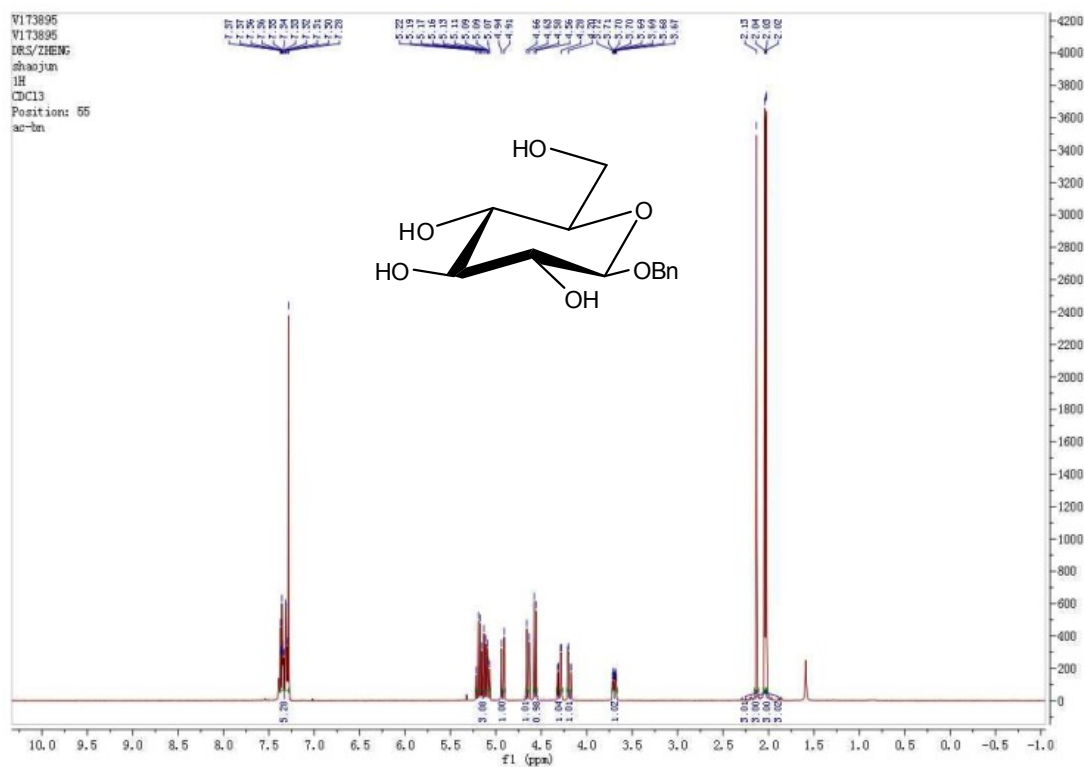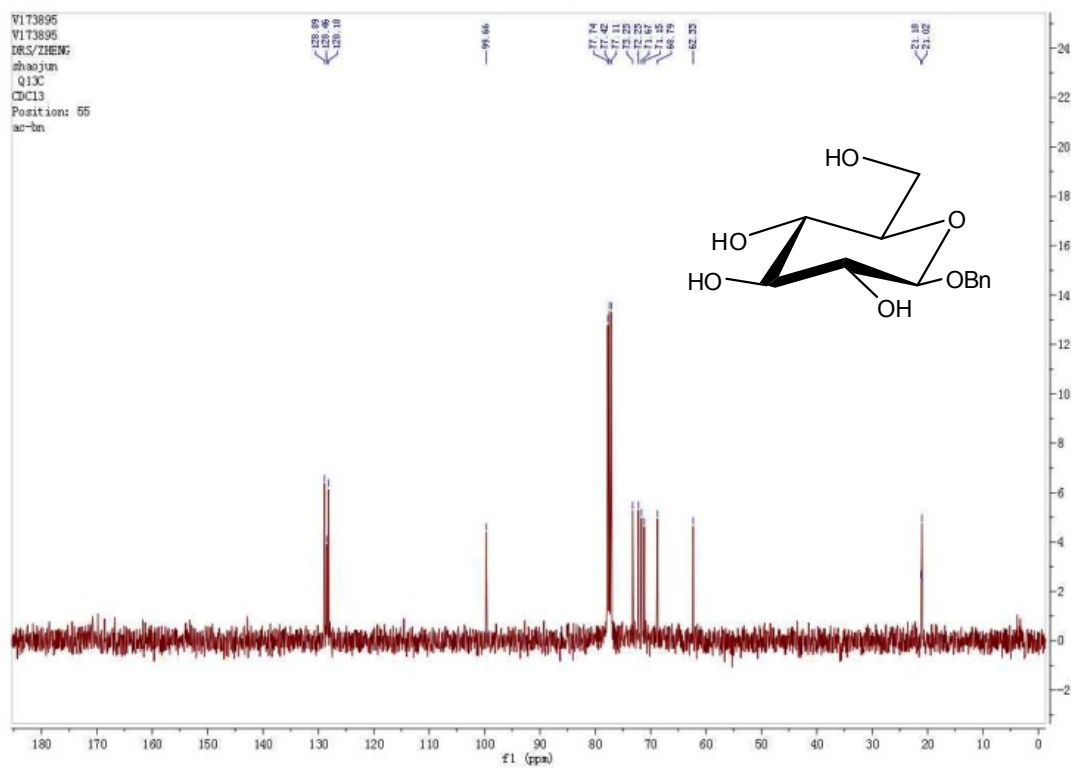

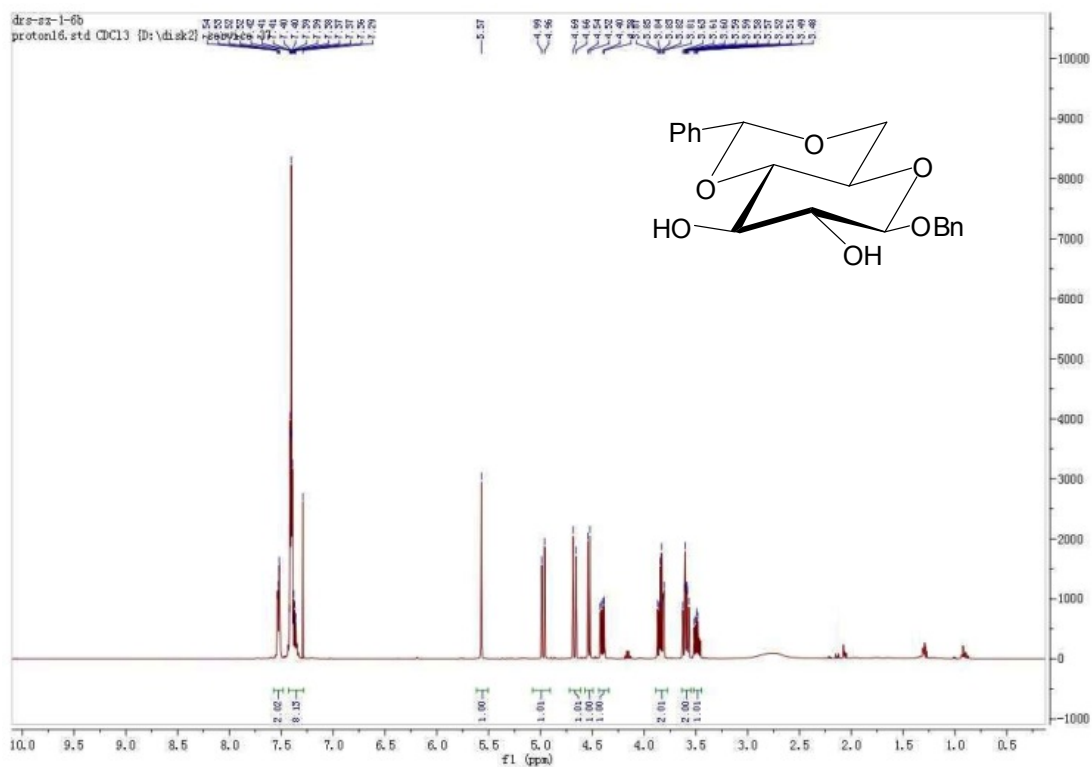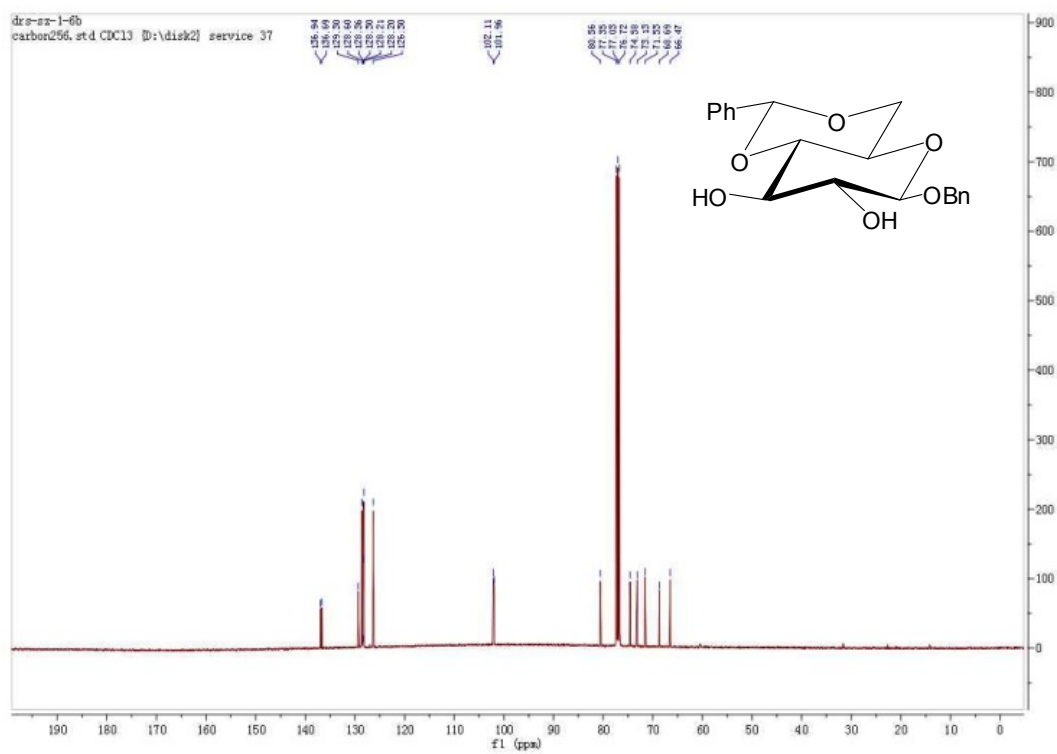

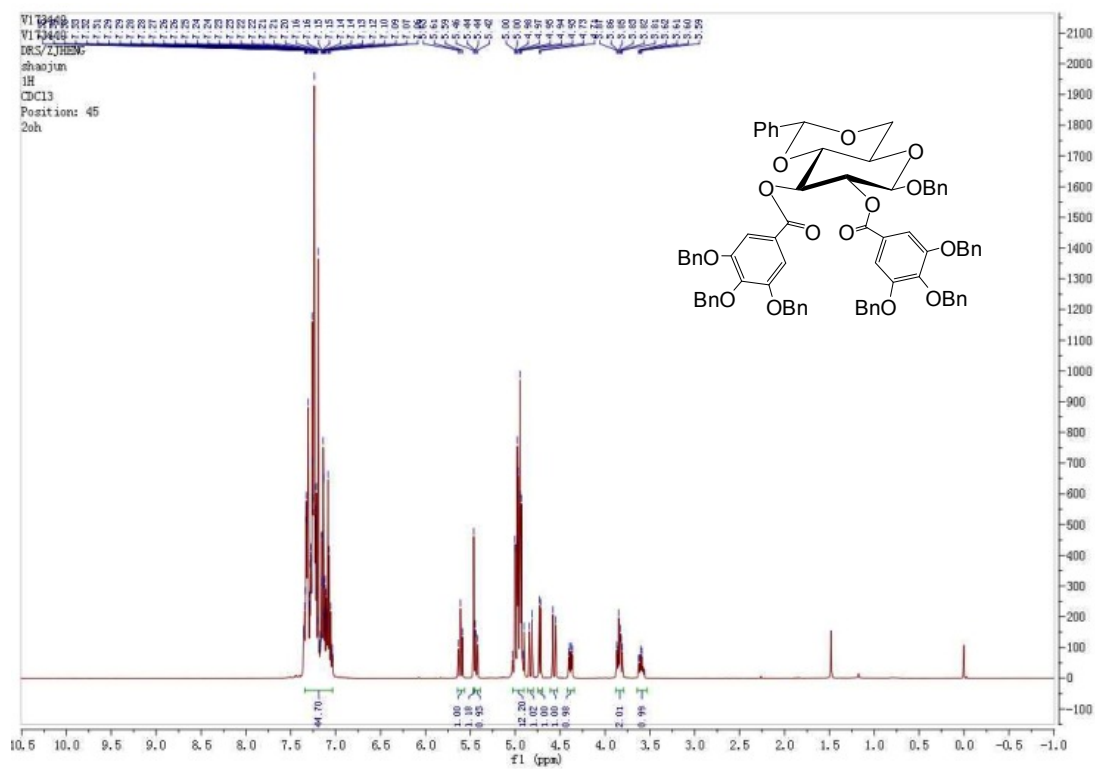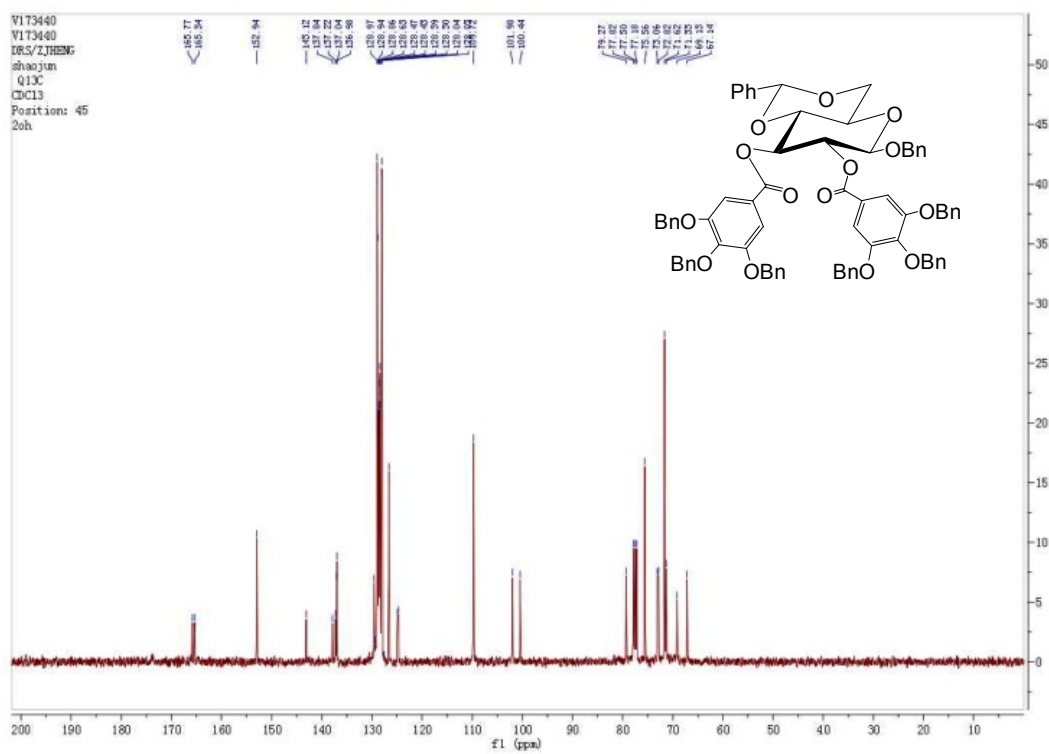

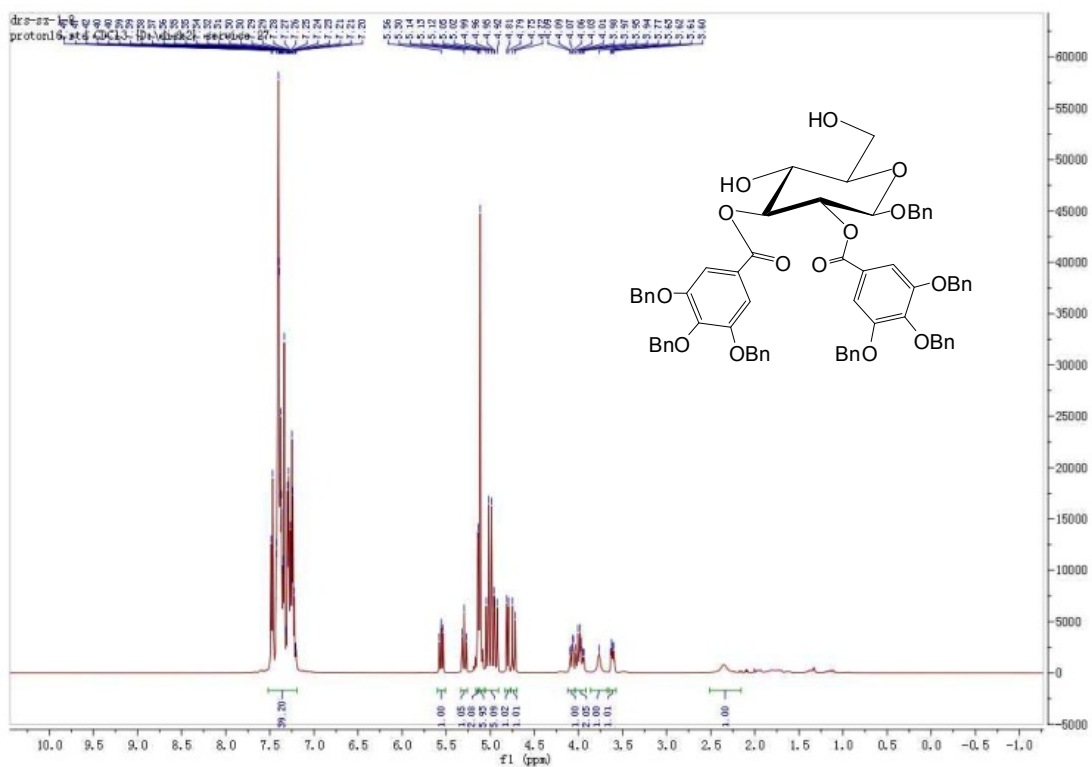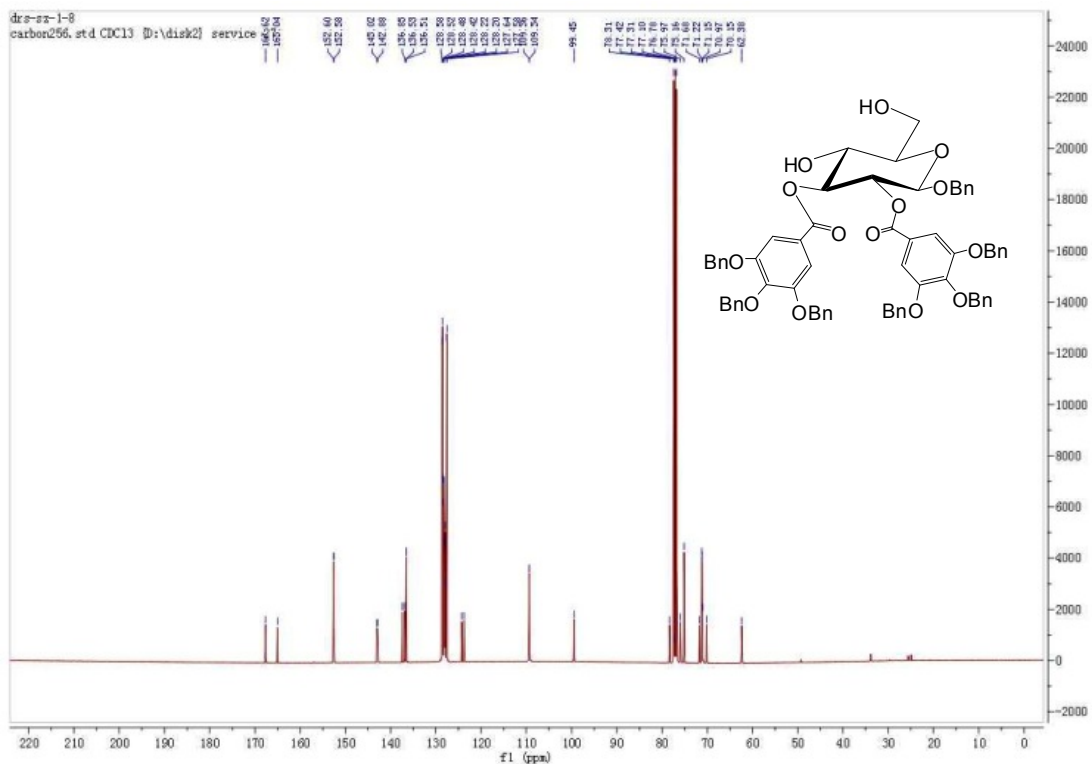



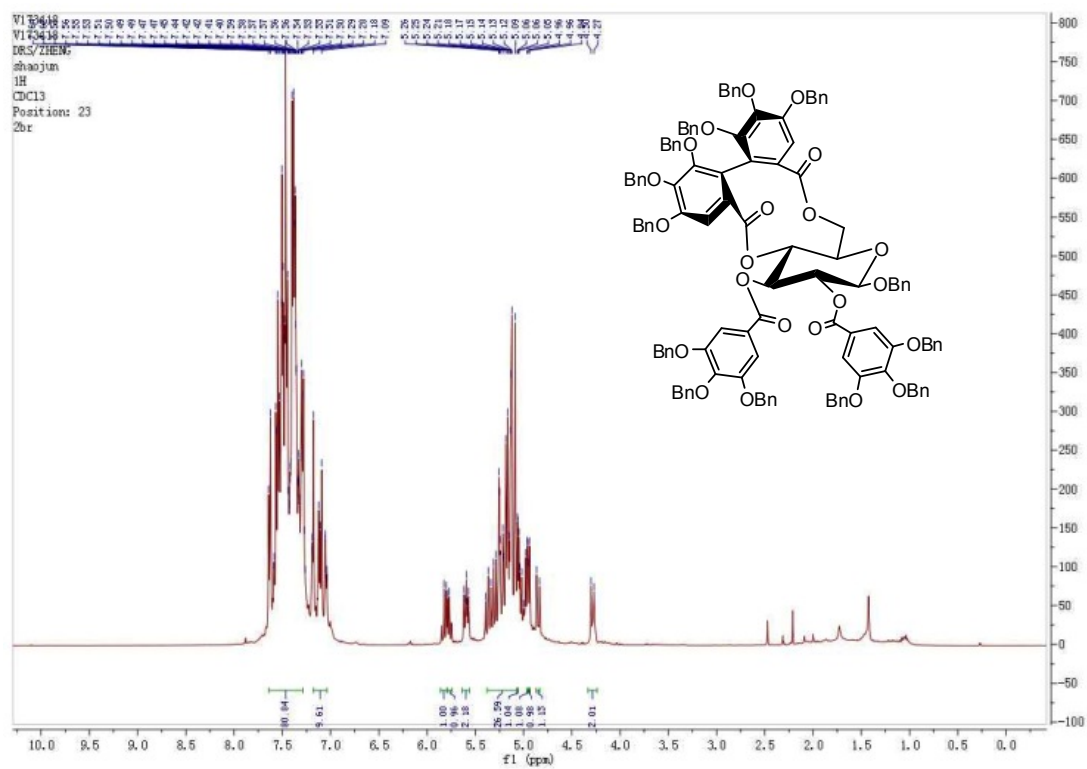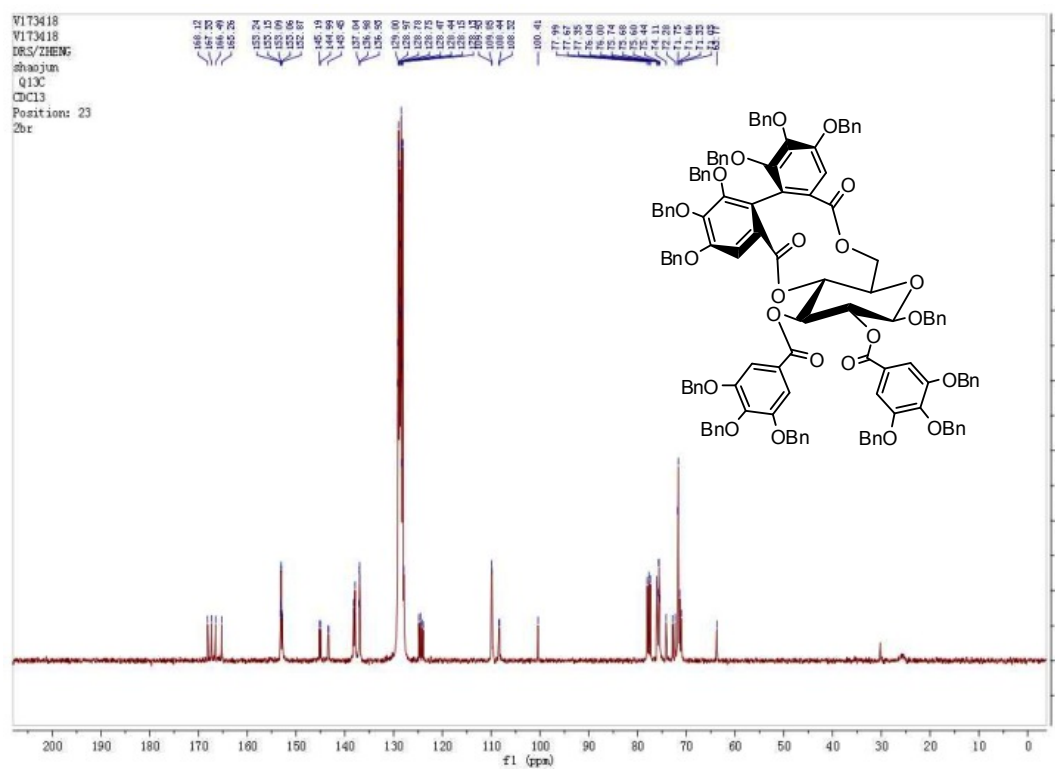



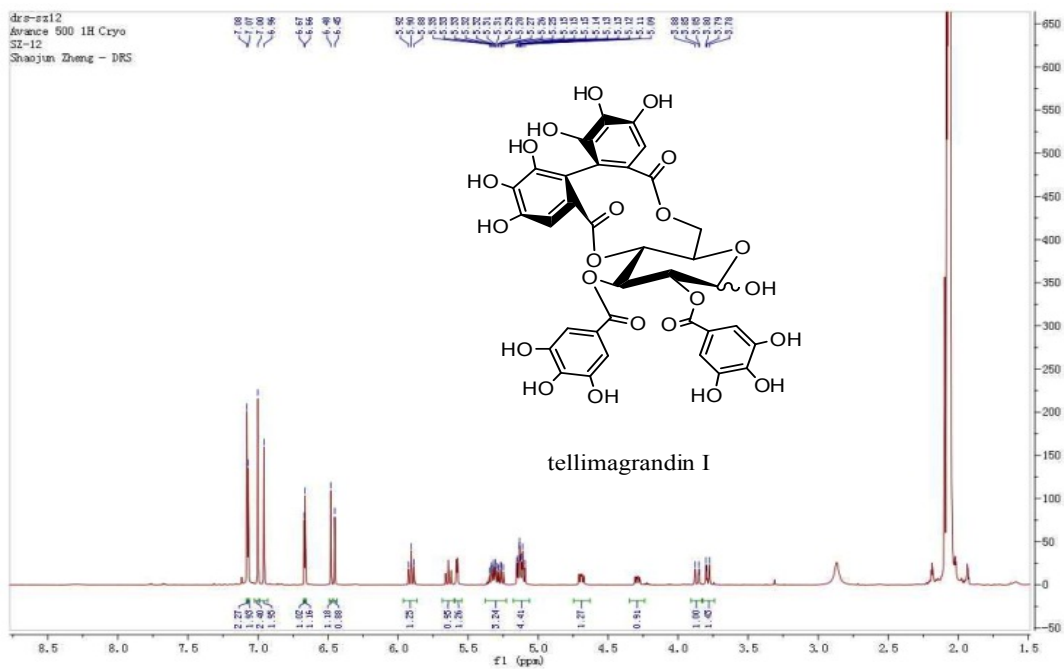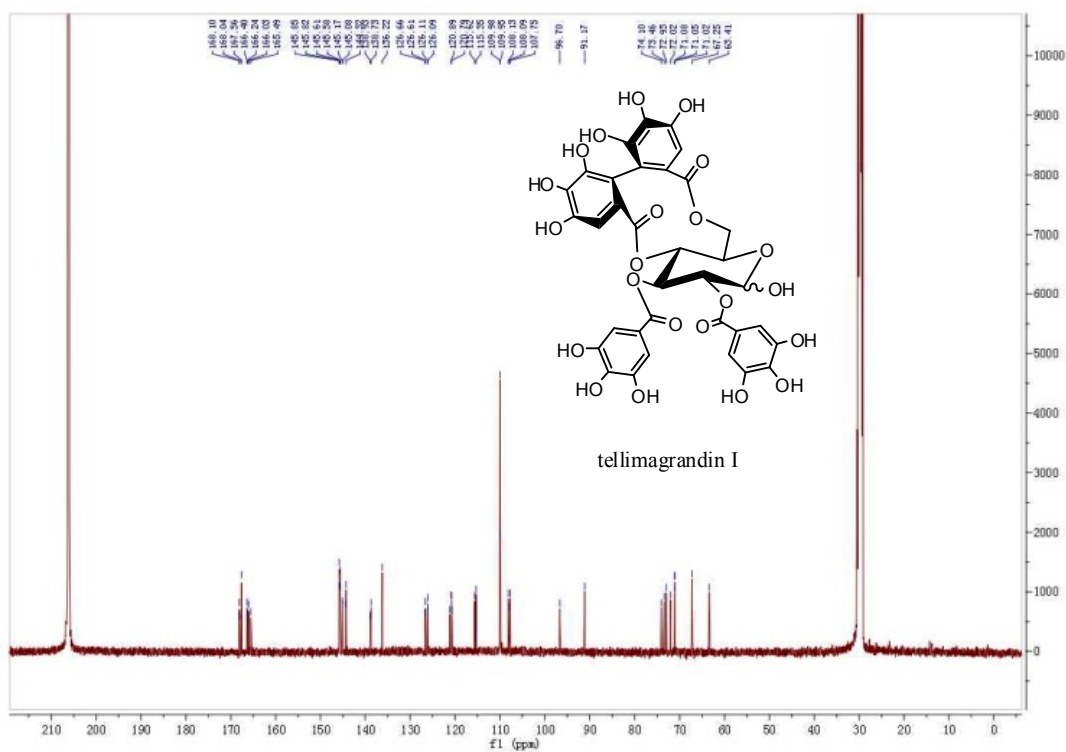

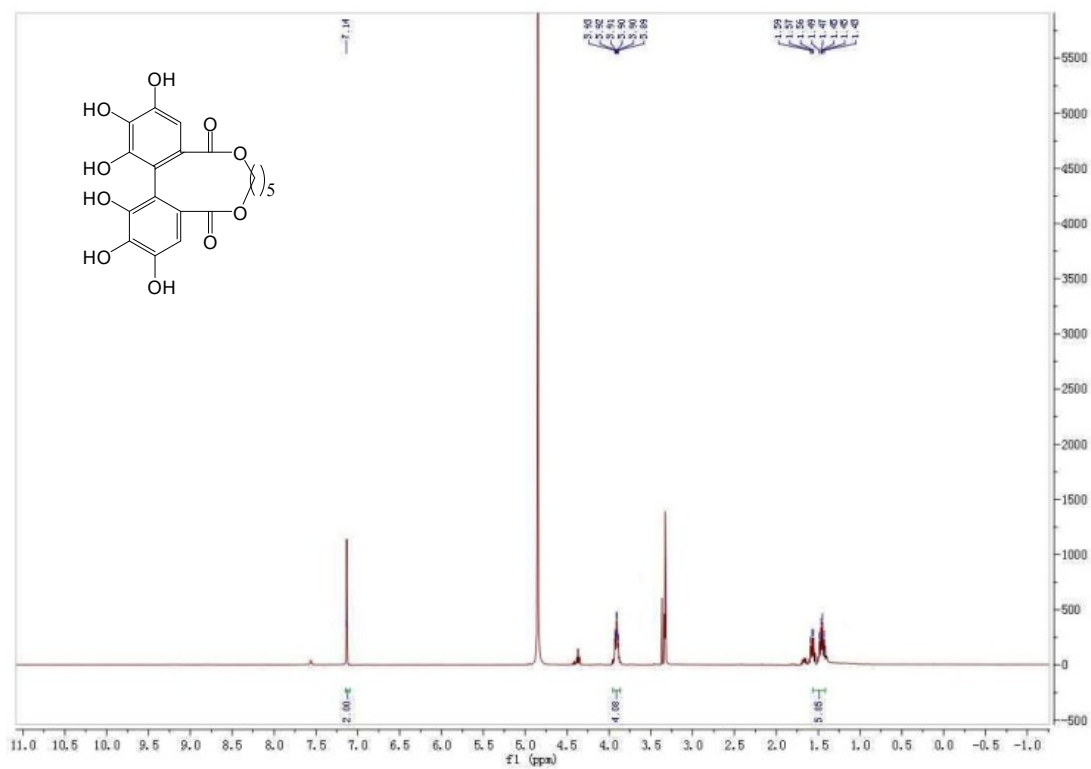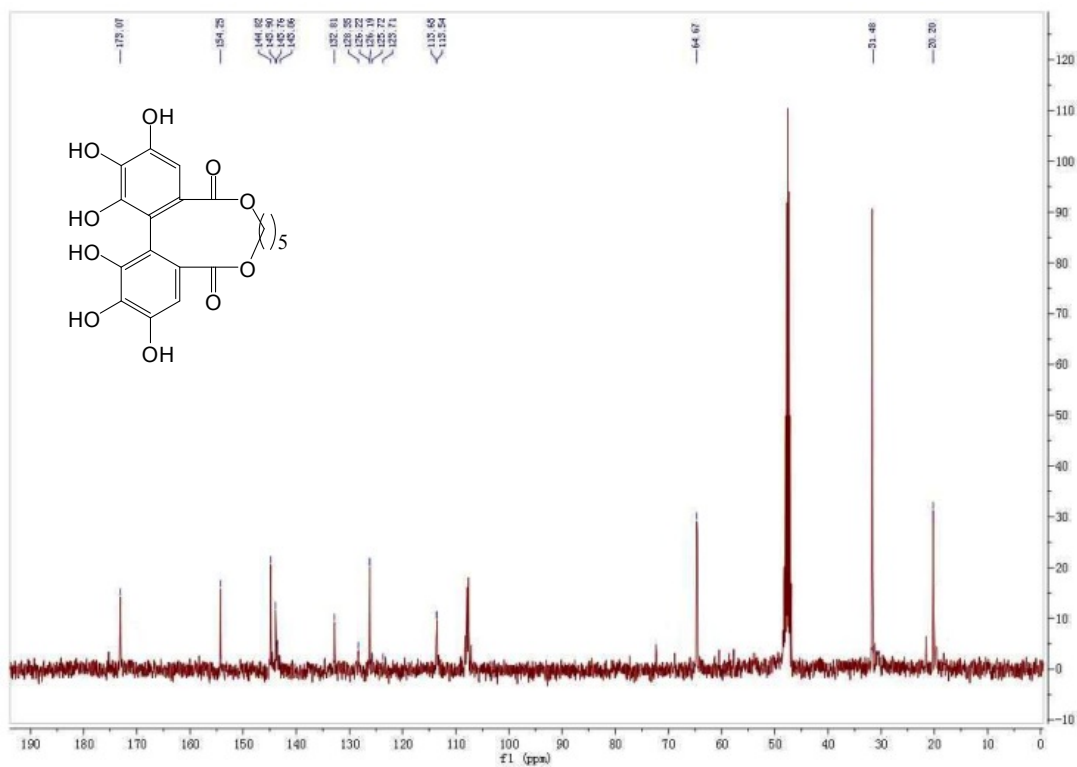

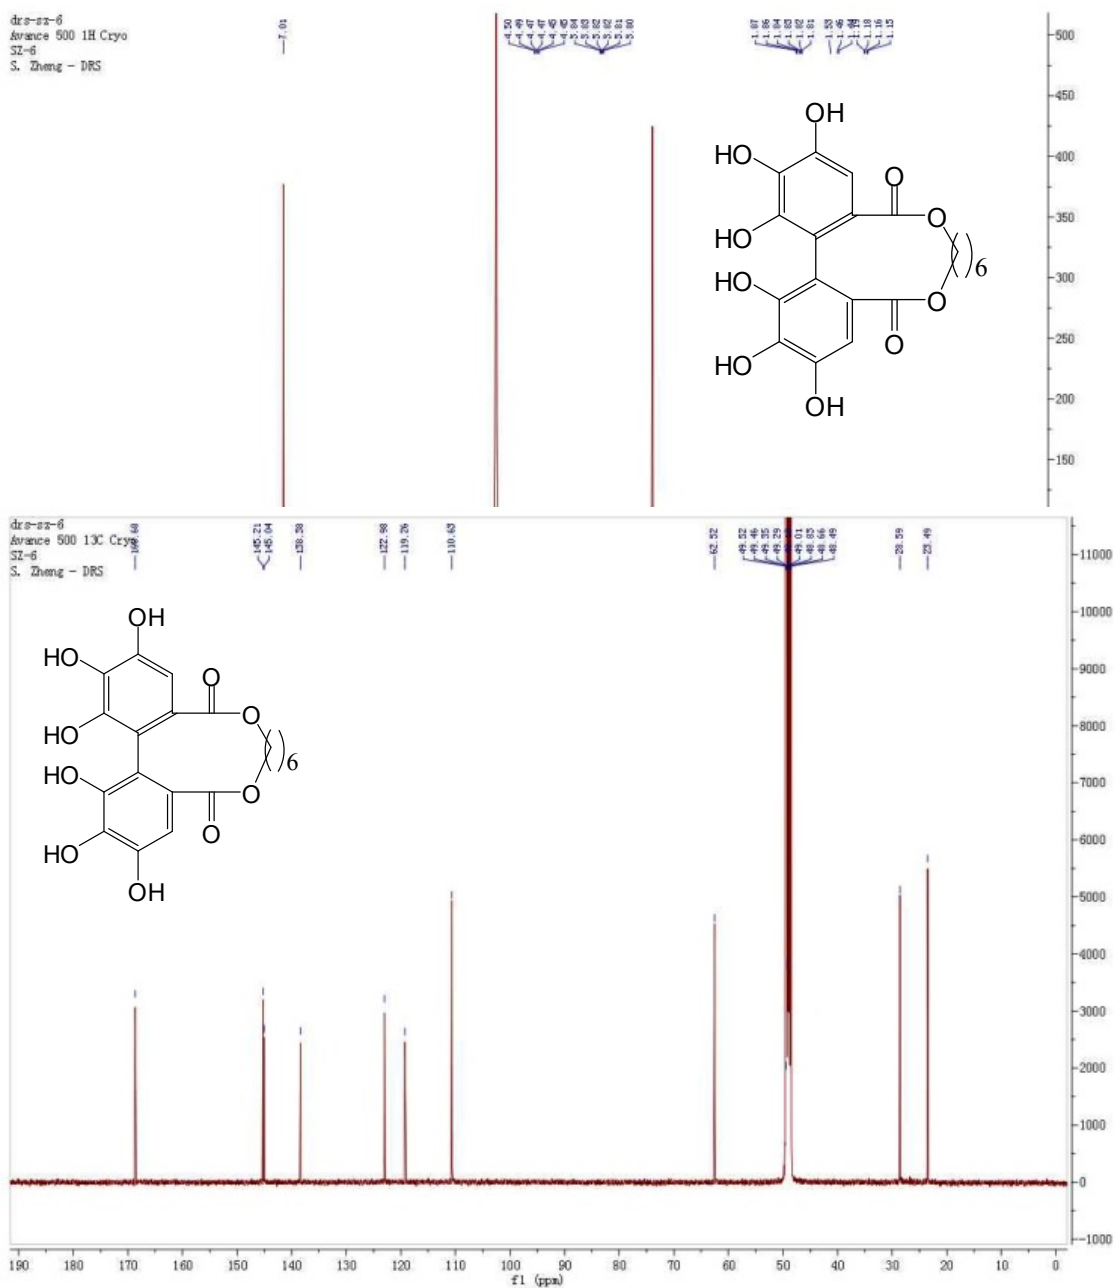

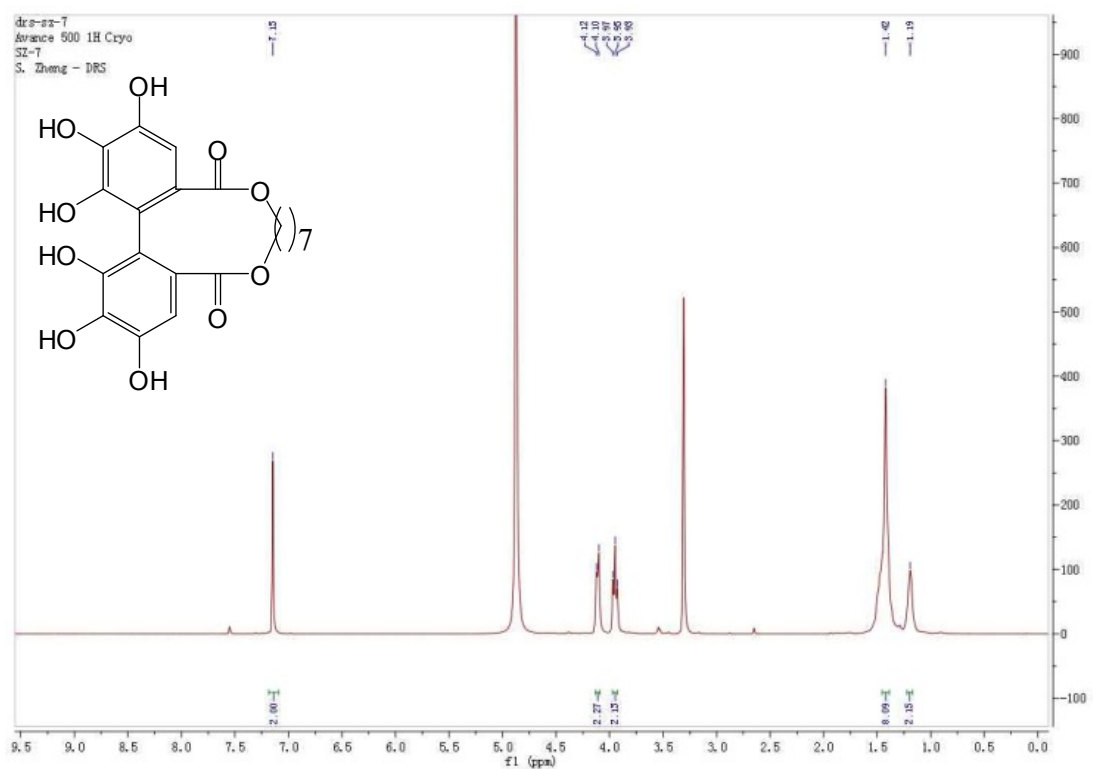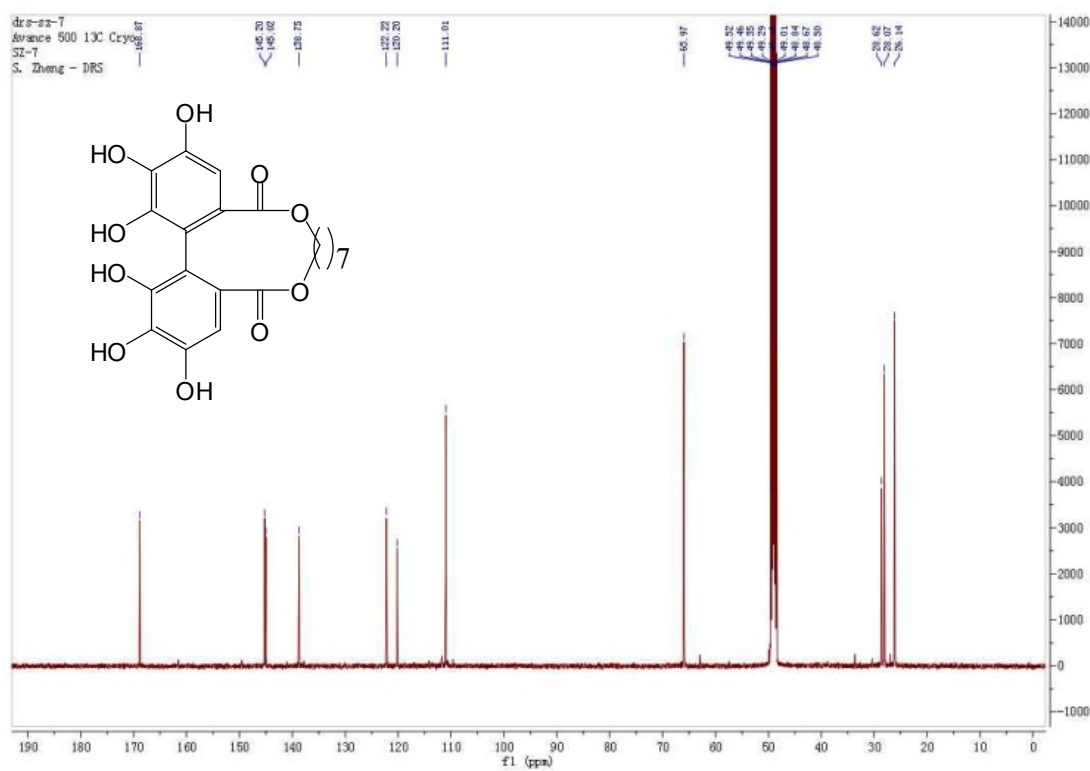

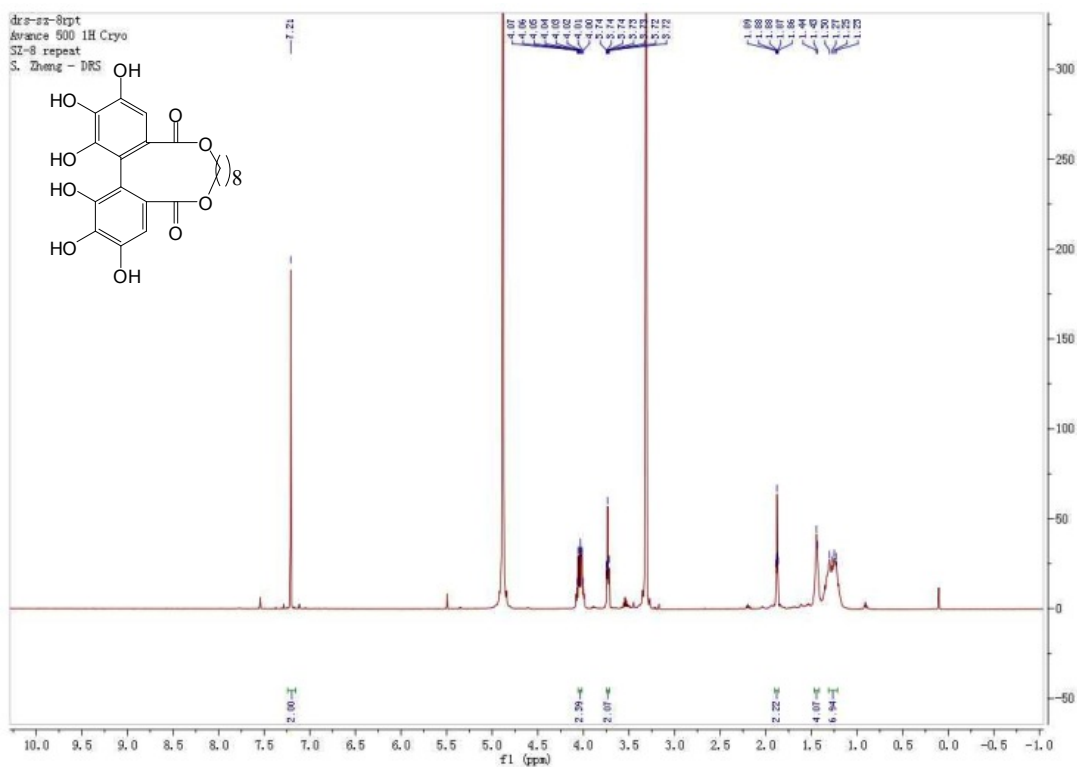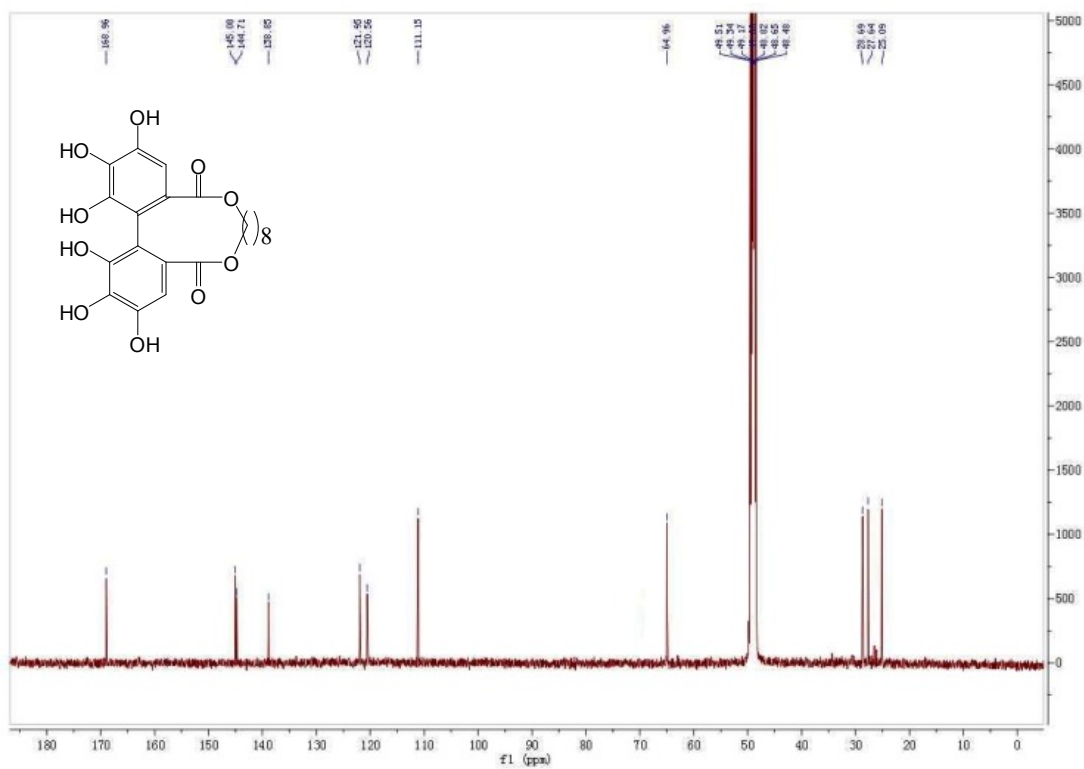

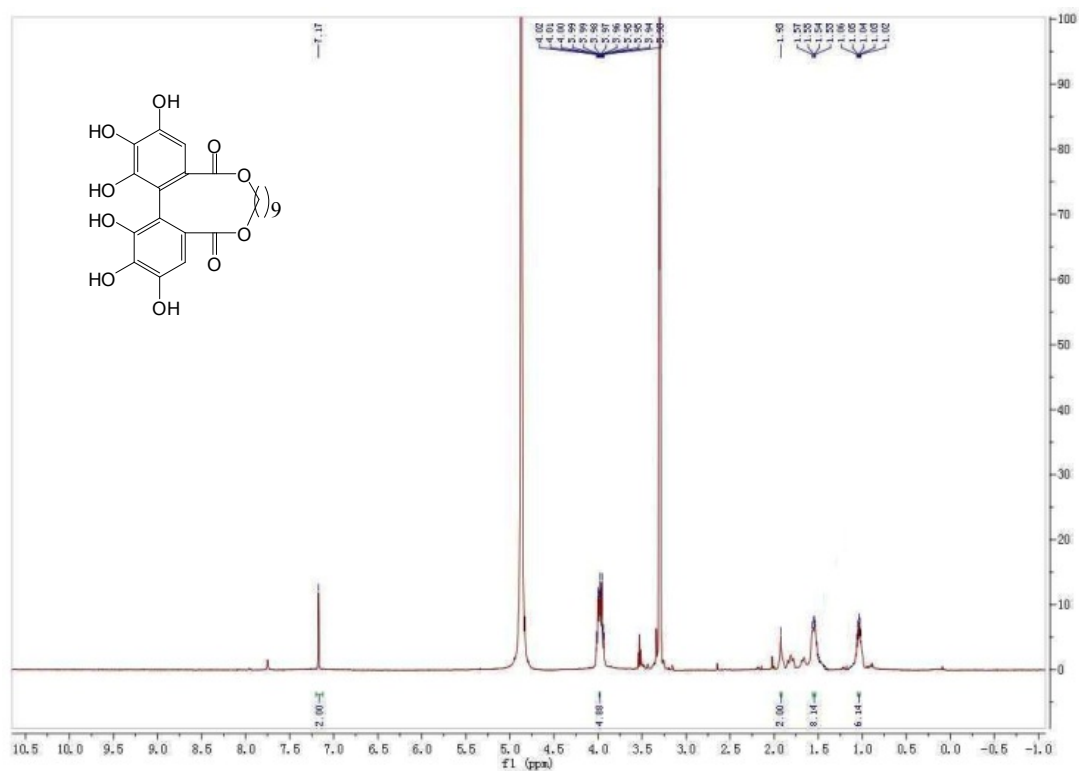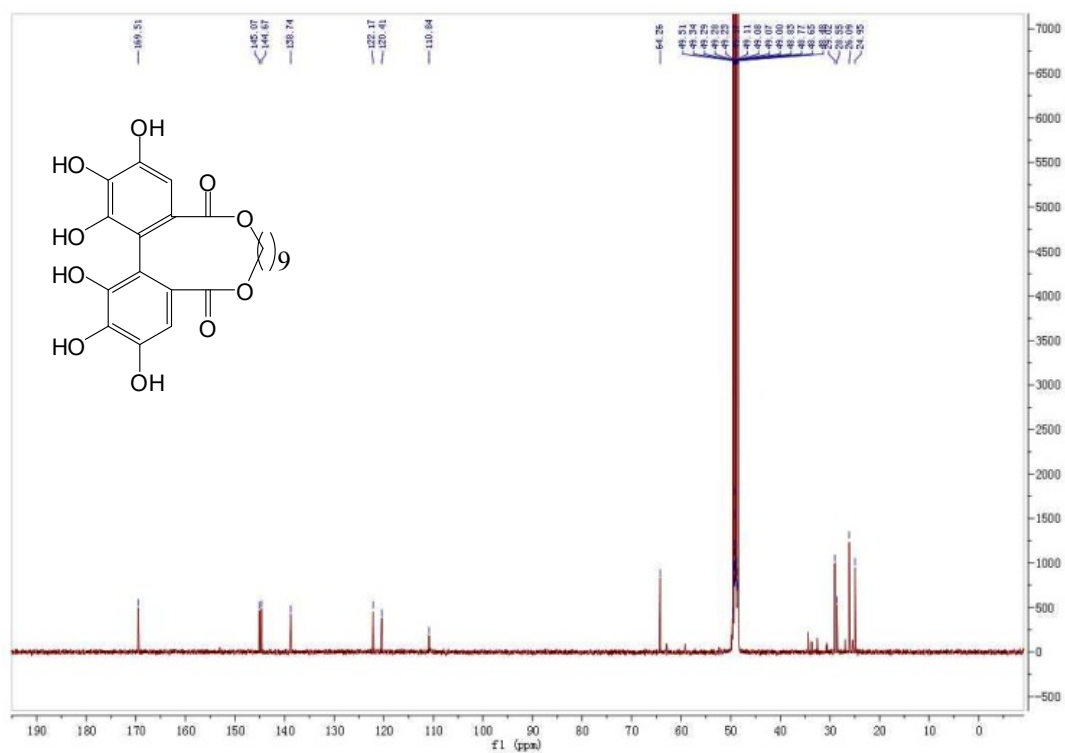

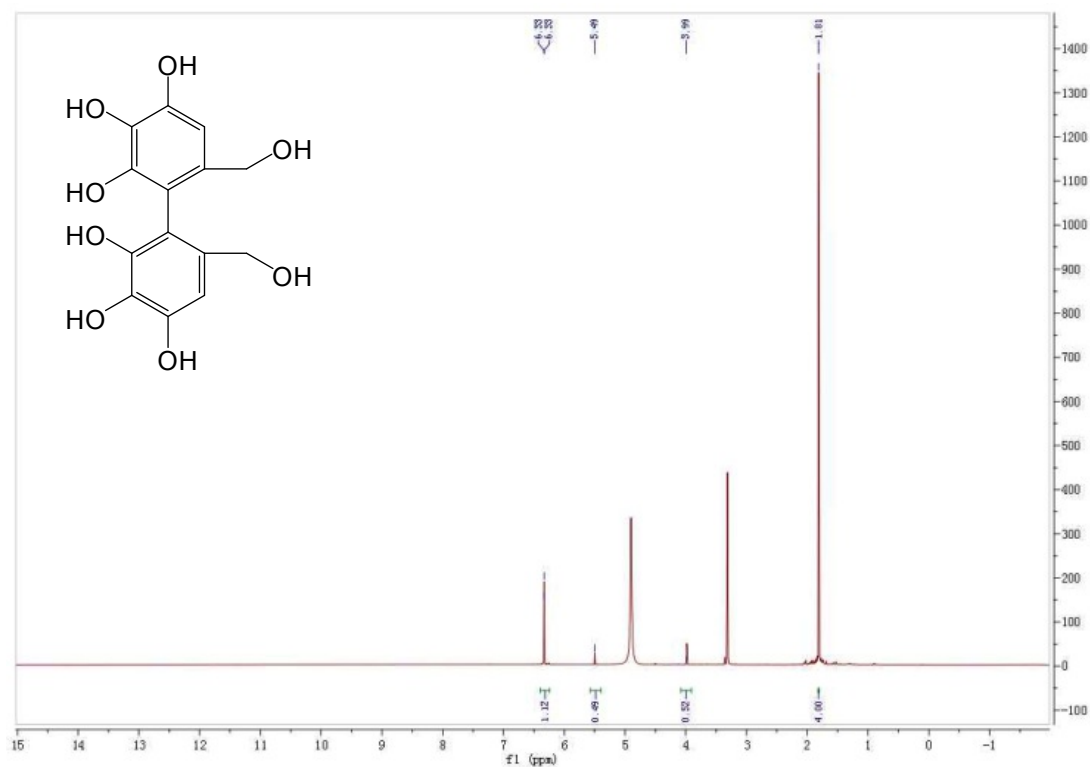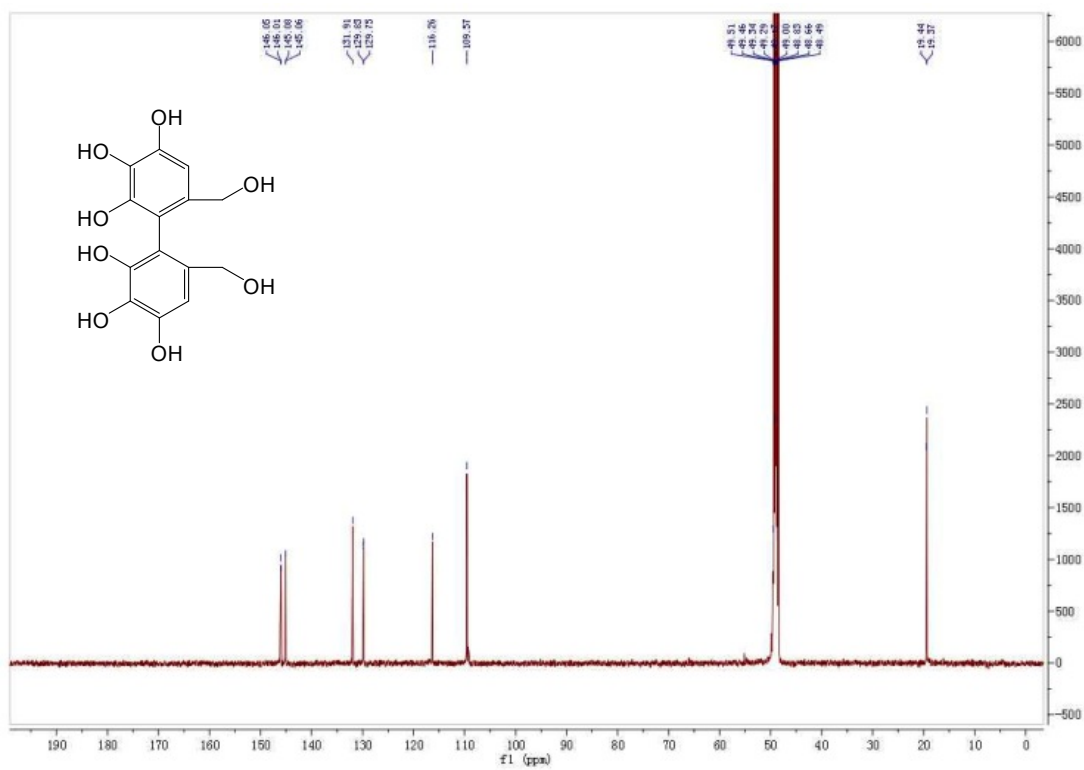

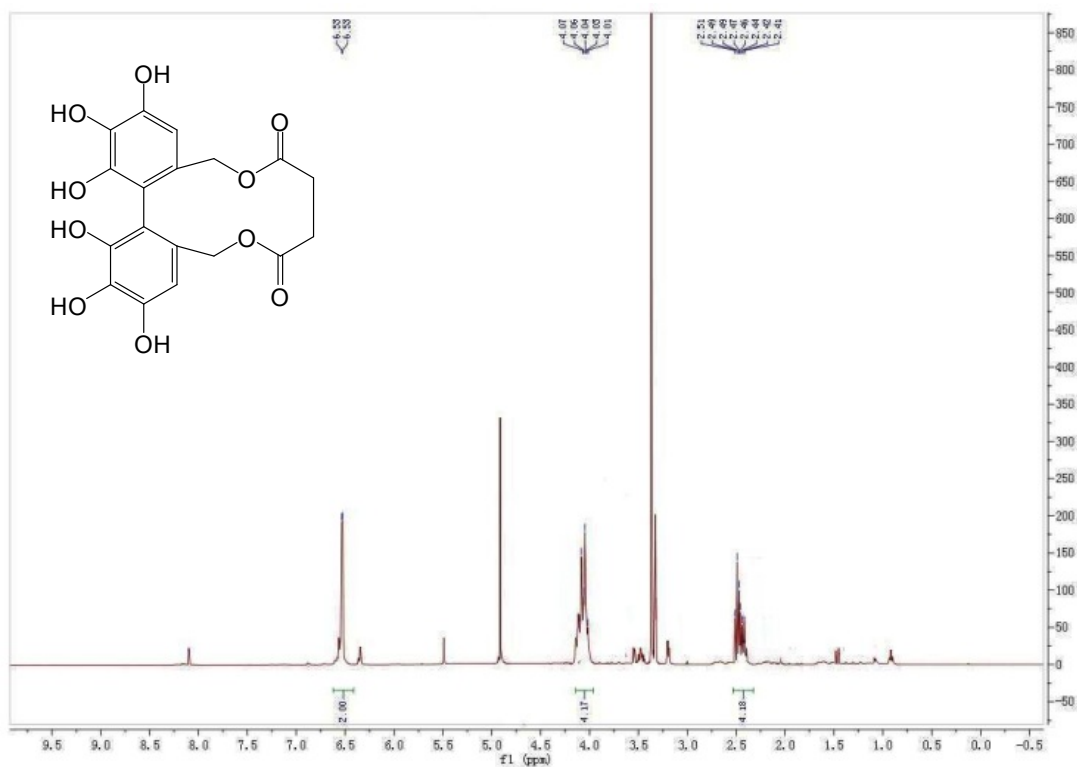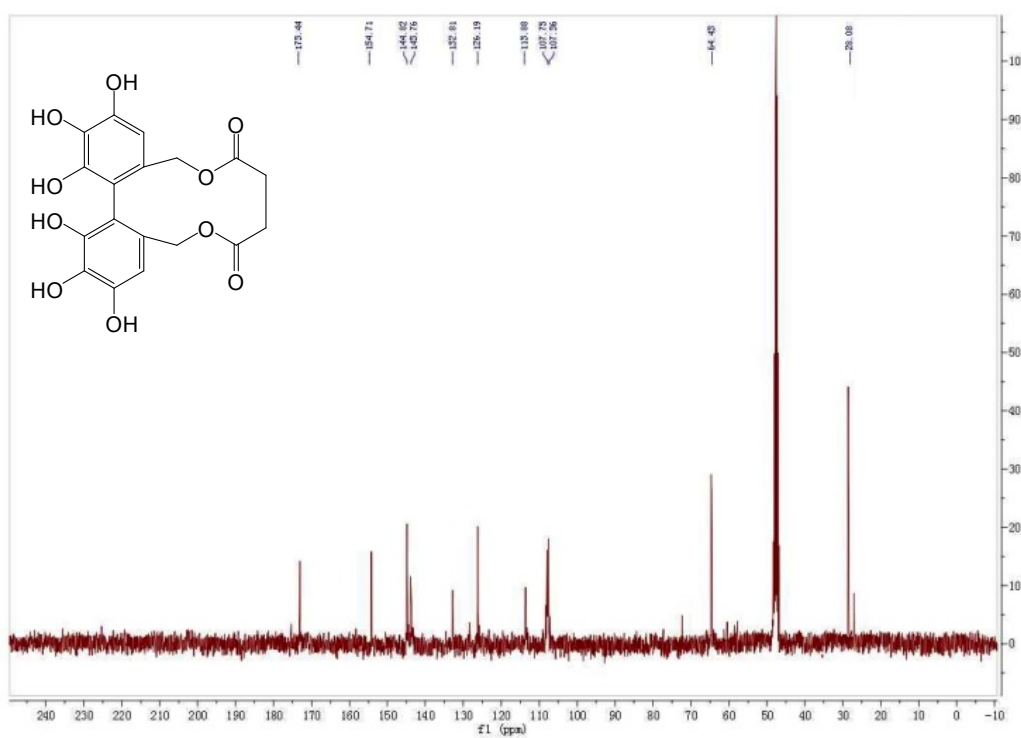



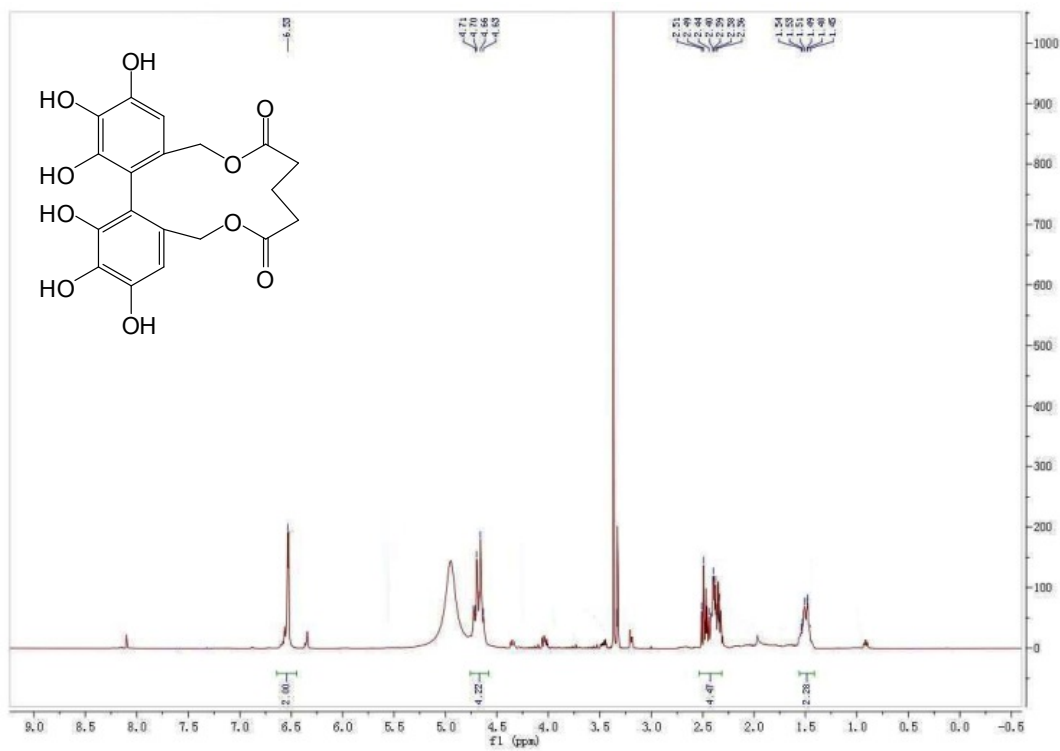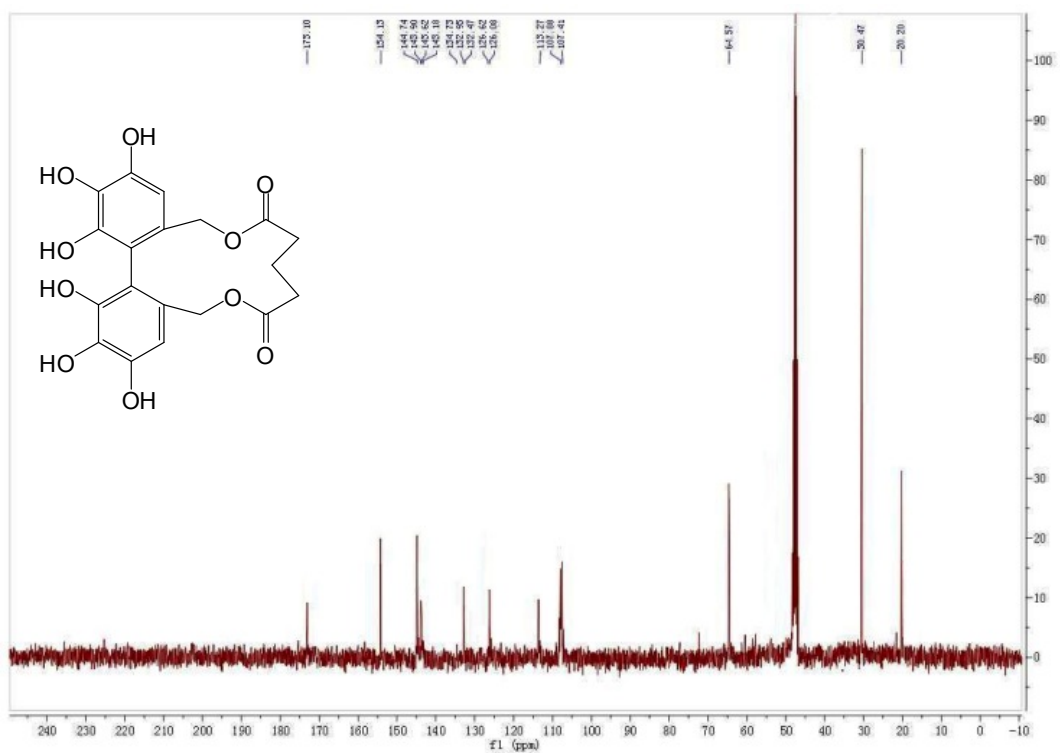

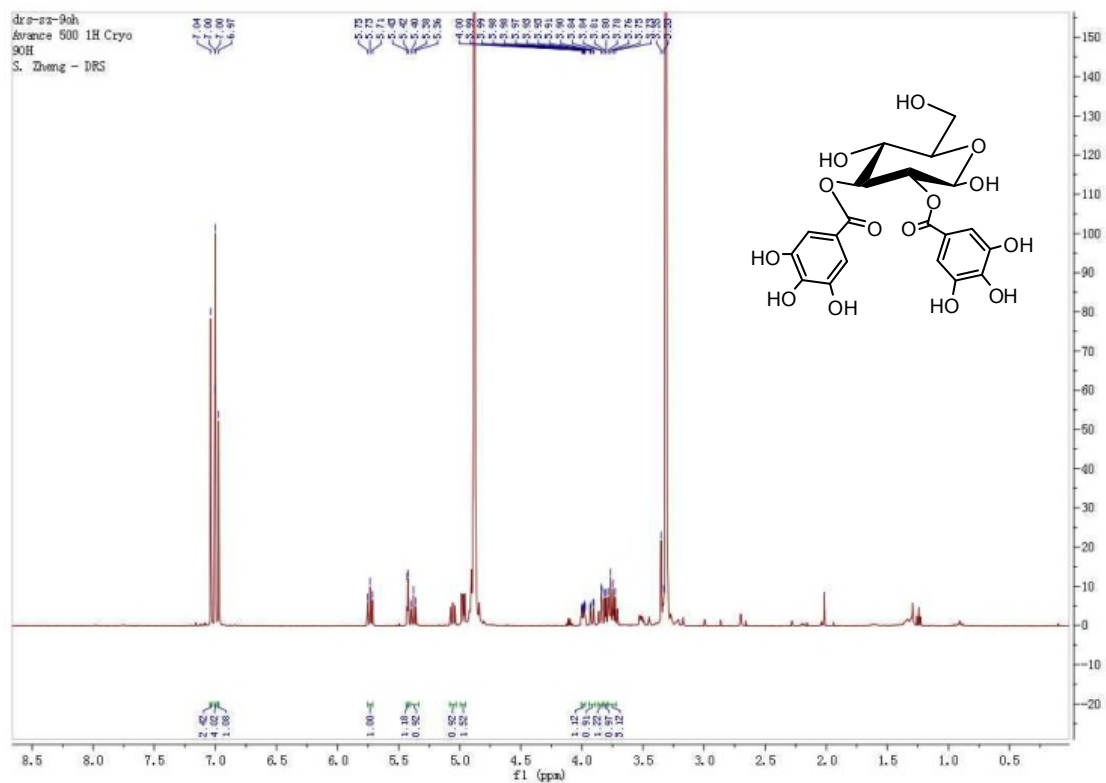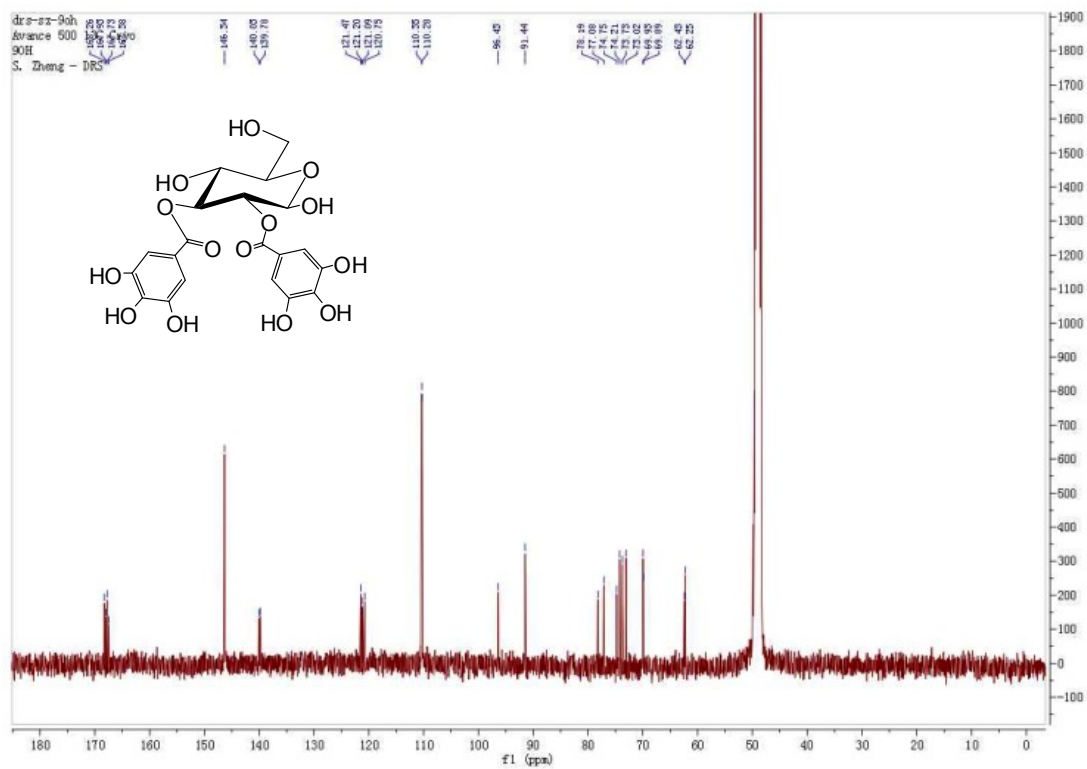

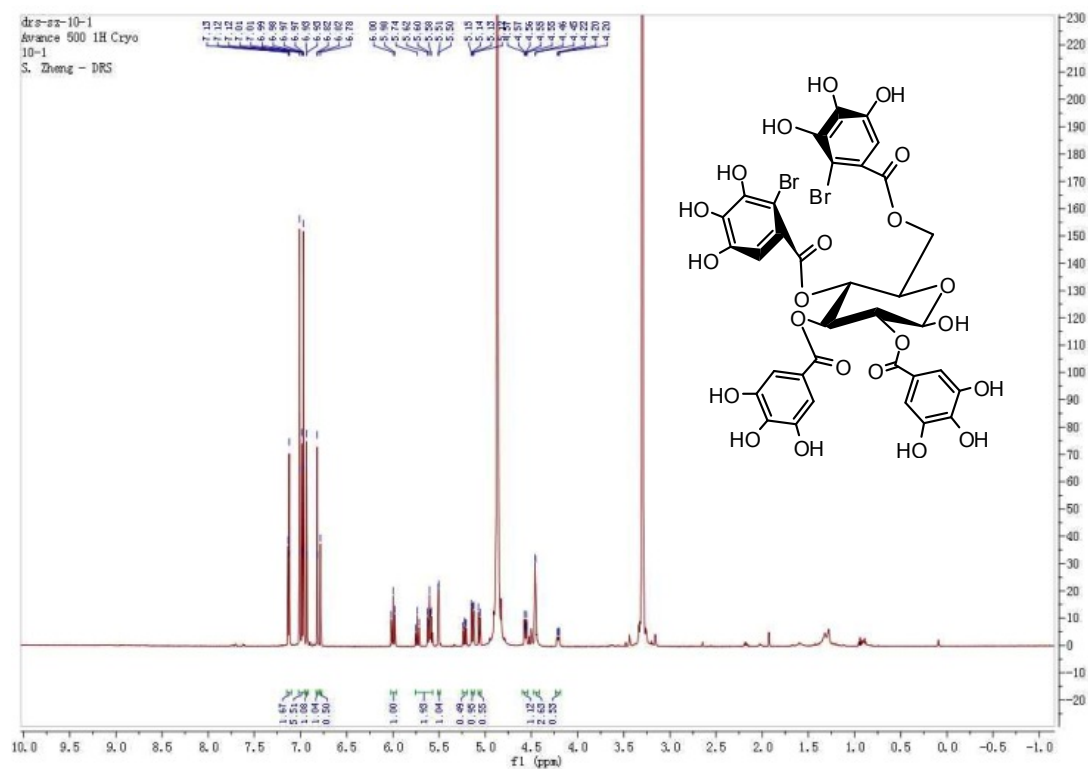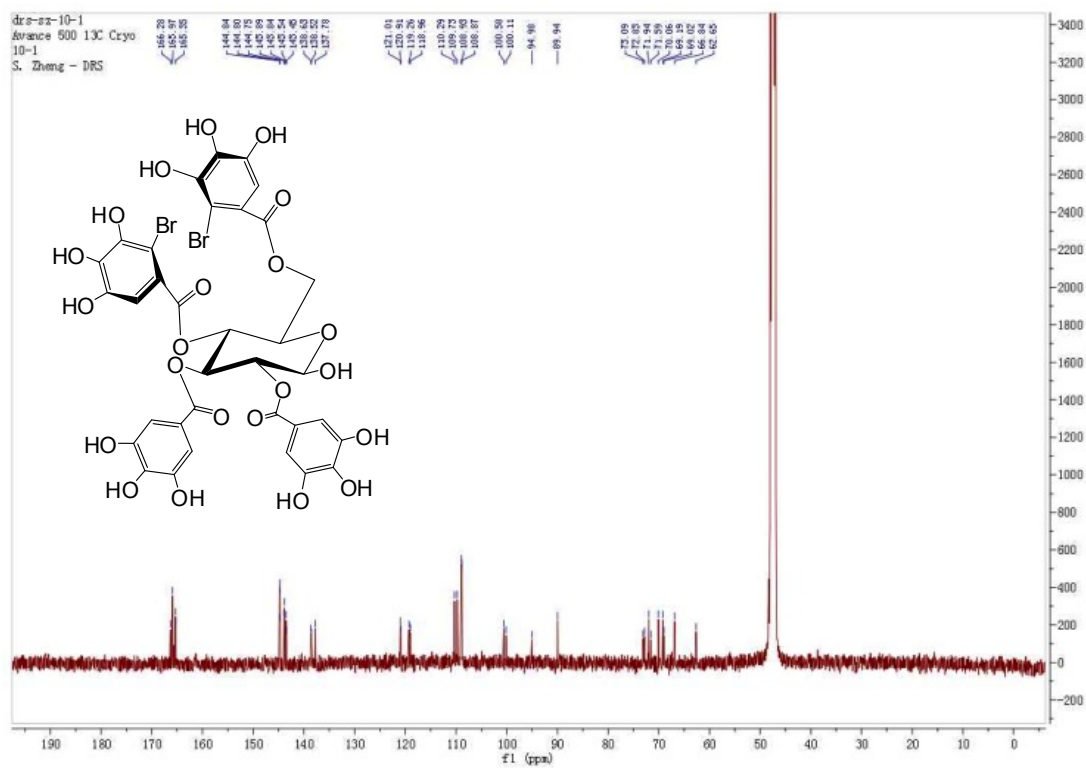

## References:

- [1] L. A. Lor, J. Schneck, D. E. McNulty, E. Diaz, M. Brandt, S. H. Thrall, B. Schwartz, *J. Biomol. Screen* **2007**, *12*, 881-890.
- [2] H. Kawamoto, F. Nakatsubo, K. Murakami, *Phytochem.* **1996**, *41*, 1427-1431.
- [3] J. Barberá, R. Iglesias, J. L. Serrano, T. Sierra, M. R. de la Fuente, B. Palacios, M. A. Pérez-Jubindo, J. T. Vázquez, *J. Am. Chem. Soc.* **1998**, *120*, 2908-2918.
- [4] X. Su, D. S. Surry, R. J. Spandl, D. R. Spring, *Org. Lett.* **2008**, *10*, 2593-2596.
- [5] S. Tranchimand, T. Tron, C. Gaudin, G. Icazio, *Synth. Comm.* **2006**, *36*, 587-597.
- [6] H. Itokawa, Y. Oshida, A. Ikuta, H. Inatomi, T. Adachi, *Phytochem.* **1982**, *21*, 1935-1937.
- [7] D. Deffieux, A. Natangelo, G. Malik, L. Pouysegu, J. Charris, S. Quideau, *Chem. Comm.* **2011**, *47*, 1628-1630.
- [8] A. Klemer, *Chem. Ber.* **1959**, *92*, 218-226.
- [9] S. Ochir, M. Nishizawa, B. Park, K. Ishii, T. Kanazawa, M. Funaki, T. Yamagishi, *J. Nat. Med.* **2010**, *64*, 275-280.
- [10] X. Su, G. L. Thomas, W. R. J. D. Galloway, D. S. Surry, R. J. Spandl, D. R. Spring, *Synthesis* **2009**, *22*, 3880,3896.
